# Approach trajectory and solar position affect host plant attractiveness to the small white butterfly

Adam J. Blake<sup>1</sup>, Samuel Couture<sup>1</sup>, Matthew C. Go<sup>1,2</sup>, Gerhard Gries<sup>1</sup>

<sup>1</sup>Department of Biological Sciences, Simon Fraser University, Burnaby, British Columbia, Canada

<sup>2</sup>New address: SNA International, supporting the Department of Defense POW/MIA Accounting Agency, Central Identification Laboratory, Joint Base Pearl Harbor-Hickam, Hawaii, USA

## Abstract

While it is well documented that insects exploit polarized sky light for navigation, their use of reflected polarized light for object detection has been less well studied. Recently, we have shown that the small white butterfly, *Pieris rapae*, distinguishes between host and non-host plants based on the degree of linear polarization (*DoLP*) of light reflected from their leaves. To determine how polarized light cues affect host plant foraging by female *P. rapae* across their entire visual range including the ultraviolet (300-650 nm), we applied photo polarimetry demonstrating large differences in the *DoLP* of leaf-reflected light among plant species generally and between host and non-host plants specifically. As polarized light cues are directionally dependent, we also tested, and modelled, the effect of approach trajectory on the polarization of plant-reflected light and the resulting attractiveness to *P. rapae*. Using photo polarimetry measurements of plants under a range of light source and observer positions, we reveal several distinct effects when polarized reflections are examined on a whole-plant basis rather than at the scale of pixels or of entire plant canopies. Most notably from our modeling, certain approach trajectories are optimal for foraging butterflies, or insects generally, to discriminate between plant species on the basis of the *DoLP* of leaf-reflected light.

**Keywords:** photo polarimetry, polarization vision, axis of polarization, degree of linear polarization, modeling

## List of symbols and abbreviations:

|          |                                                                                                                         |
|----------|-------------------------------------------------------------------------------------------------------------------------|
| $I$      | intensity                                                                                                               |
| $DoLP$   | degree of linear polarization                                                                                           |
| $AoP$    | axis of polarization                                                                                                    |
| R        | Red (575-700 nm, see Fig. S1c)                                                                                          |
| G        | Green (450-625 nm, see Fig. S1c)                                                                                        |
| B        | Blue (400-525 nm, see Fig. S1c)                                                                                         |
| UV       | Ultraviolet (325-400 nm, see Fig. S1c)                                                                                  |
| $\phi$   | angle between the azimuth of the observer and the light source (see Fig. 1)                                             |
| $\theta$ | elevation of light source (see Fig. 1)                                                                                  |
| $\omega$ | angle between observer and light source with the plant at its vertex (see Fig. 1)                                       |
| $\psi$   | 2-dimensional component of $\omega$ perpendicular to the plane passing through both the observer and plant (see Fig. 1) |
| $\zeta$  | elevation of the observer (see Fig. 1)                                                                                  |

## 1 **Introduction**

2 Many insects exploit polarized skylight to aid in navigation (Labhart & Meyer, 1999) but  
3 their use of reflected polarized light for host plant detection and selection has hardly been studied  
4 (Heinloth et al., 2018). Recently, the small white butterfly, *Pieris rapae* (Linnaeus, 1758), which  
5 uses cabbage and other crucifers as host plants (Chew & Renwick, 1995), has been shown to  
6 discriminate among host and non-host plants based on the degree of linear polarization (0-100%,  
7 *DoLP*) of foliar reflections (Blake et al., 2019). Similar to many other insects (Ilić et al., 2016;  
8 Mishra, 2015; Wachmann, 1977), the rhabdom of *P. rapae* photoreceptors is untwisted with  
9 uncurved microvilli that are aligned along the rhabdom's length (Blake et al., 2019; Qiu et al.,  
10 2002). Rhabdomeric photoreceptors have an inherent dichroism due to the tubular structure of  
11 the microvilli (Horváth & Varjú, 2004). In the ventral compound eye of other insects such as  
12 honey bees, *Apis mellifera*, desert ants, *Cataglyphis bicolor*, crickets, *Gryllus campestris*, and  
13 cockchafers, *Melolontha melolontha*, the photoreceptors along with the microvilli composing the  
14 rhabdom twist along the photoreceptor's longitudinal axis (Wehner & Bernard, 1993). This twist  
15 serves to disrupt the alignment of microvilli along the rhabdom, preventing preferential  
16 absorption of light vibrating in a direction, or with an axis of polarization (0-180°, *AoP*), parallel  
17 to the microvillar orientation, as shown in *P. rapae* and other insects. Polarization can result in  
18 perceived shifts in color and/or intensity as compared to polarization-blind visual systems  
19 (Kelber et al., 2001; Kinoshita et al., 2011).

20 Shiny surfaces like water, glass or plant foliage can polarize light through specular reflection  
21 (Foster et al., 2018). These reflections are polarized in a direction so that their *AoP* is parallel to  
22 the surface. The strength of this polarization (*DoLP*) is dependent on the incident angle, with  
23 maximal polarization occurring at the Brewster's angle (approximately 55° for foliage; Grant et

24 al., 1993; Johnsen, 2011). The polarization of this light is consequently dependent upon the angle  
25 ( $\omega$ ) formed between the sun, the reflecting leaf surface, and the observer (i.e., a camera or insect;  
26 Fig. 1). This angle is itself dependent upon the solar and observer elevation and azimuth, making  
27 these aspects important predictors of foliar polarization (Hegedüs & Horváth, 2004). As it is only  
28 the specular component of the reflection that is polarized, leaf surface characteristics that  
29 increase surface roughness and diffuse reflectance, such as pubescence, epicuticular waxes or  
30 undulations, also affect the *DoLP* (Grant et al., 1993). The *DoLP* can also be altered by reducing  
31 diffuse reflectance through pigmentation absorption (Horváth & Varjú, 1997), resulting in an  
32 increased foliar *DoLP* in the red and blue relative to green.

33 As *DoLP* is an important host plant cue, at least for female *P. rapae* (Blake et al., 2019), it  
34 would be informative to compare the *DoLP* and *AoP* of multiple host and non-host plants. While  
35 the polarization of select plant species has previously been examined (Grant et al., 1993), and  
36 photo polarimetry has been used to examine plant surfaces (Horváth et al., 2002), photo  
37 polarimetry has not yet been used to compare foliar reflected polarized light among different  
38 plant species. Moreover, polarization characteristics of foliage in the ultraviolet range (UV, 320-  
39 400 nm) have been predicted to resemble those in the human-visible range (400-700 nm)  
40 (Horváth et al., 2002), but this prediction has never been experimentally tested. Therefore, our  
41 first objective was to use photo polarimetry to characterize the *DoLP* and *AoP* of foliar  
42 reflections from host and non-host plants of *P. rapae* and to compare polarization characteristics  
43 of foliage in both the UV and human-visible range.

44 Further knowledge gaps pertain to the question as to how interspecific differences in foliar  
45 polarization are affected by the position of the observer and the light source. Positional effects  
46 have been investigated in relation to single leaves (Hegedüs & Horváth, 2004; Horváth et al.,

47 2002) but not whole plants. Therefore, our second objective was to use photo polarimetry to  
48 measure select plant species under a series of light source and observer positions in order to  
49 model how approach trajectory affects foliar *AoP* and *DoLP*, and thus plant attractiveness, to  
50 host-plant-seeking female *P. rapae*.

## 51 **Methods**

52 **Plant material** Within a greenhouse, we grew plants in pots (12.7 cm diam), thinning to  
53 one plant per pot except for fall rye and oregano. In these species, multiple plants per pot  
54 generated a leaf area more comparable to that of the other species examined (Table S1). Plants  
55 selected for photography in experiments were 10-20 cm tall with 4-6 fully expanded true leaves  
56 (BBCH 14-16).

57 **Polarimetry of Experimental Plants** We used photo polarimetry (Foster et al., 2018;  
58 Horváth & Varjú, 2004) to measure the intensity (*I*), *DoLP* and *AoP* of the selected plants. To  
59 obtain these measurements, we used a modified Olympus E-PM1 camera (Olympus, Tokyo,  
60 Japan) with expanded sensitivity in the UV (320-400 nm) (Fig S1c; Dr. Klaus Schmitt,  
61 Weinheim, Germany, [uvir.eu](http://uvir.eu)) and an ultra-broadband linear polarizing filter (68-751, Edmund  
62 Optics, USA). We narrowed sensitivity to the human-visible range (400-700 nm) and the UV  
63 range with a UV/IR filter (Baader Plantarium, Mammendorf, Germany) and a U-filter (Baader  
64 Plantarium), respectively. To calculate the *DoLP* and the *AoP*, we took four images with the  
65 polarizing filter positioned at 0°, 45°, 90° and 135°.

66 We kept the white-balance, aperture, and other exposure controls constant between  
67 exposures, with all images captured in a raw image format. Within the image-analysis software  
68 platform Fiji (Schindelin et al., 2012), we used a series of custom-created macros for image

69 analysis and measurement (Blake et al., 2020b). We decoded images with DCRAW (Coffin,  
70 2019) as a 16-bit linear bitmap, persevering sensor linearity. We determined color corrections  
71 necessary to ensure accurate color representation through photographing a 99% Spectralon  
72 reflectance standard (SRS-99-010, Labsphere, NH, USA) under similar lighting conditions as the  
73 experimental plants (Blake et al., 2020b). We aligned all images ( $0^\circ$ ,  $45^\circ$ ,  $90^\circ$ ,  $135^\circ$ ) from each  
74 plant using TurboReg (Thévenaz et al., 1998) and separated the plant in each image from the  
75 background (see below). We then calculated Stokes parameters (including  $I$ ,  $DoLP$ , and  $AoP$  for  
76 each pixel in the red (575-700 nm), green (455-610 nm), blue (410-530 nm) and UV (330-395  
77 nm) bands of the electromagnetic spectrum (Fig. S1c) and averaged all pixel values to give a  
78 whole-plant mean for both the intensity ( $I$ ) and the  $DoLP$ , and a modal value for the  $AoP$ .

79 **Interspecific comparisons of foliar reflectance (Exp. 1)** We photographed plants upright  
80 inside a black velvet-lined box lit by a 400 W Hortilux® Blue metal halide lamp  
81 (MT400D/BUD/HTL-BLUE, EYE Lighting Int., Mentor, OH, USA) suspended 75-80 cm above  
82 the box (Fig. S2). Light was directed onto a plant by a white-cardstock tube ( $12.5 \times 21.6$  cm),  
83 thus minimizing reflections from the box walls. The camera was positioned 75-80 cm from the  
84 plant at approximately the same height as the plant canopy (Fig. S2).

85 In all exposures ( $0^\circ$ ,  $45^\circ$ ,  $90^\circ$ ,  $135^\circ$ ) and color bands (UV, blue, green, red), we used a  
86 background mask to isolate the plant from the background. We created the background mask  
87 using areas above  $\sim 2.3\%$  of the maximum pixel value in the green band. To eliminate possible  
88 effects of shading or unequal areas of the plants being directly lit, we limited estimations of  
89  $DoLP$  and  $AoP$  to areas of the image above 5% of the maximum pixel value in each color band.  
90 We further limited estimates of  $AoP$ , in this and subsequent experiments, to areas with a  $DoLP$

91 greater than 15%, as below this *DoLP* estimates of *AoP* have little meaning (Horváth & Varjú,  
92 1997).

93 **Effect of light source azimuth and elevation on foliar polarization (Exp. 2)** To photograph  
94 plants in various light source elevation and azimuth combinations (Fig. 1abce), we used  
95 scaffolding to precisely vary the height of the metal halide lamp and a movable platform to keep  
96 the camera and plant in orientation. Subtle variations in plant height did result in some variation  
97 in light source elevation but these variations and those of related angles were incorporated into  
98 the analyses. We positioned a black velvet background behind the plant in each image to enable  
99 optimal separation of the plant from the background. We took these measurements using a subset  
100 of the species we examined in the previous experiment, selecting plants with shiny leaves  
101 (potato, white mustard), matte leaves (cabbage, rutabaga) and fall rye, which holds its leaves in a  
102 more vertical orientation. We omitted UV polarimetry in this and the subsequent experiment  
103 because plants would shift position due to positive phototropism (Koller, 2000) during the  
104 extended time frame needed for several long UV exposures. Omitting UV polarimetry in  
105 experiment 2 was further justified given the strong correlation ( $R^2 = 75\%$ ) between *DoLP* in the  
106 UV and blue found in experiment 1 (see Results).

107 As the intensity of the black velvet background varied considerably with the position of the  
108 metal halide lamp, we could not specify a single intensity threshold to separate the plant from the  
109 background as we had in the previous experiment. We therefore used a combination of all three  
110 human visual color bands to manually create a background mask. As we wanted to compare the  
111 plant in different light source positions, we estimated *DoLP* from the same subset of pixels  
112 specified by the background mask rather than limiting *DoLP* to areas with a specific intensity, as  
113 in the previous experiment.

114 **Effect of observer elevation on foliar polarization (Exp. 3)** Using cabbage and white  
115 mustard, we applied the same procedure as described above to examine the effect of observer  
116 elevation (camera in this case). At each observer elevation ( $14^\circ$ ,  $0^\circ$ ,  $-14^\circ$ ), we photographed the  
117 plant at a subset of the combinations of elevation and azimuth mentioned above (Fig. 1de).

118 **Statistical analysis** We compared foliar reflection among species (Exp. 1), using a linear  
119 model with post-hoc Tukey's test (Table S2; Blake et al., 2020b). We analyzed the effects of  
120 light source and observer positions (Exps. 2, 3) on foliar polarization, using mixed models with  
121 plant included as a random effect (Table S2; Bates et al., 2015). We incorporated  $\psi$  into models  
122 of *DoLP* as the square of its cosine, whereas  $\omega$  was incorporated in these models via  $p(\omega)$  as  
123 described in the Fresnel equations below (1-3), with  $n_1$  being the refractive index of air (1.00)  
124 and  $n_2$  being the refractive index of the leaf surface (1.34-1.79, depending on color band). For  
125 each color band, we chose the leaf surface refractive index that minimized model deviance  
126 (Blake et al., 2020b). In modeling the effect of observer elevation (Exp. 3), we incorporated  $\zeta$   
127 into existing models from Exp. 2 as its arctangent, and scaled  $\zeta$  by a factor of 16 so its effect  
128 would quickly reach an asymptote as  $\zeta$  moved away from 0 (Table S2; Blake et al., 2020b).

$$R_s(\omega) = \frac{\left| \left( n_1 \cos \frac{\omega}{2} \right) - n_2 \sqrt{1 - \left( \frac{n_1}{n_2} \sin \frac{\omega}{2} \right)^2} \right|^2}{\left| \left( n_1 \cos \frac{\omega}{2} \right) + n_2 \sqrt{1 - \left( \frac{n_1}{n_2} \sin \frac{\omega}{2} \right)^2} \right|^2} \quad (1)$$

$$R_p(\omega) = \frac{\left| n_1 \sqrt{1 - \left( \frac{n_1}{n_2} \sin \frac{\omega}{2} \right)^2} - \left( n_2 \cos \frac{\omega}{2} \right) \right|^2}{\left| n_1 \sqrt{1 - \left( \frac{n_1}{n_2} \sin \frac{\omega}{2} \right)^2} + \left( n_2 \cos \frac{\omega}{2} \right) \right|^2} \quad (2)$$

$$p(\omega) = 1 - \frac{R_s(\omega)}{R_p(\omega)} \quad (3)$$

129 **Modeling the effect of solar elevation and azimuth on host attractiveness to *Pieris rapae***

130 Utilizing the models for *DoLP* and *AoP* from Exp. 3 (Table S2), we predicted *DoLP* and *AoP*



131 across most possible values of  $\zeta$  (-15–90°), all possible values of  $\phi$  (0–360°), and a selection of  $\theta$   
132 values (15, 45, 75°; Blake et al., 2020b). These predictions were limited to the blue color channel  
133 as there were insufficient data to fit *AoP* models for the red and green color bands. Then using  
134 the ranges of *DoLP* and *AoP* shown to be unattractive to *P. rapae* (Blake et al., 2019), we  
135 modeled approach trajectories that would result in attractive and unattractive polarization  
136 characteristics, as well as low *DoLP* (<10%, moderately attractive).

## 137 **Results**

138 **Interspecific comparisons of foliar reflectance (Exp. 1)** There were statistically significant  
139 differences in both intensity and *DoLP* among plant species in all color bands (Figs. 2ab, S3ab,  
140 S4ab, S5ab; Table S2). In contrast, we found minimal, although sometimes statistically  
141 significant, differences in *AoP* among plant species (Figs. 2c, S3c, S4c, S5c; Table S2).  
142 Differences in intensity and *DoLP* were comparably large in the UV and blue color bands. The  
143 comparatively shiny-leaved species had a much higher *DoLP* than the matt-leaved species, but  
144 only in the blue and UV bands (Figs. 2b, S5b), where most *P. rapae* host plants grouped  
145 together.

146 **Effect of light source azimuth and elevation on foliar polarization (Exp. 2)** For all three  
147 color bands, there was a strong relationship between  $\omega$  and *DoLP* (Figs. 3, S6, S7; Table S2),  
148 with *DoLP* increasing as  $\omega$  approached double the Brewster's angle (53-60°). This relationship  
149 was less pronounced when the plants were lit more from the side (larger  $\psi$  angle). Fall rye with  
150 mostly vertical leaf orientation showed a different and weaker relationship between  $\omega$  and *DoLP*  
151 (Figs. 3a, S6a, S7a).

152 There was an approximately proportional negative relationship between the  $\psi$  angle and *AoP*  
153 in all color bands (Figs. 4, S8, S9; Table S2). The slope of this relationship was steepest when  
154 the light source was behind the observer ( $\phi = 0$ ).

155 **Effect of observer elevation on foliar polarization (Exp. 3)** The effect of  $\omega$  on *DoLP*  
156 increased with the elevation of the observer ( $\zeta$ ; Figs. 5, S10, S11; Table S2). The elevation of the  
157 observer also affected *AoP* (Fig. S12). The slope of the relationship between the  $\psi$  angle and *AoP*  
158 was shallower at lower observer elevations, while the effect of the  $\phi$  angle on the relationship  
159 between  $\psi$  angle and *AoP* was more pronounced at higher observer elevations. These effects were all  
160 relatively subtle in comparison to the effects of light source position.

161 **Modeling the effect of solar elevation and azimuth on host plant attractiveness to *Pieris***  
162 *rapae* As indicated by our modeling, the greatest *DoLP* of foliage is realized when the light  
163 source is located directly behind the plant (Figs 6a-c, S13a-c). Effects of solar elevation ( $\theta$ ) on  
164 *DoLP* could be compensated for, in part, by shifting the observer elevation ( $\zeta$ ) but lower observer  
165 elevation reduced overall *DoLP*.

166 Our model predicts that the greatest range of *AoP* across all  $\phi$  angles tested is found when  
167 solar elevation ( $\theta$ ) is low, with  $\phi$  angles at or near  $180^\circ$  always yielding an *AoP* near  $90^\circ$ . We also  
168 note that smaller shifts in *AoP* occur with  $\phi$  angle at lower observer angles ( $\zeta$ ), but this effect is  
169 relatively small.

170 When we modeled  $\zeta$ ,  $\phi$  and  $\theta$  values resulting in combinations of *DoLP* and *AoP* attractive  
171 and unattractive to *P. rapae* (Figs. 6, S13), there was consistently a window of attractive *DoLPs*  
172 at a  $\phi$  angle of  $180^\circ$ , and a moderately attractive low *DoLP* area opposite it at a  $\phi$  angle of  $0^\circ$ . All  
173 other combinations of  $\phi$  and  $\zeta$  resulted in unattractive *DoLPs*. Increasing solar elevation ( $\theta$ )  
174 shifted the attractive window downward and the low *DoLP* area upwards. Increased solar

175 elevation ( $\theta$ ) also decreased the size of the attractive window, while increasing the size of the  
176 low *DoLP* area. The *AoP* had little effect on these windows outside of a small narrowing of the  
177 attractive window at low solar elevations ( $\theta$ ).

## 178 **Discussion**

179 Our study confirms earlier work demonstrating large differences in *DoLP* among plant species  
180 (Blake et al., 2019; Grant et al., 1993) and refines our understanding of polarized reflections  
181 from plant foliage. Unlike previous studies that examined polarized reflections of single leaves,  
182 models of leaves, or plant canopies (Grant et al., 1993; Hegedüs & Horváth, 2004; Horváth et al.,  
183 2002; Horváth & Hegedüs, 2014; Maignan et al., 2009; Raven, 2002; Rondeaux & Herman,  
184 1991; Vanderbilt & Grant, 1985; Woolley, 1971), we recorded reflections from entire plants  
185 thereby revealing several emergent phenomena. Most importantly, our modeling suggests that  
186 certain approach trajectories are optimal for foraging insects to discriminate among plant species  
187 based on the *DoLP* of foliar reflections.

188 Our measurements of polarization of foliar reflections are consistent with point-source  
189 polarimetry data (Grant et al., 1993), and other photo polarimetry of plant surfaces (Fig. 2,S3-5;  
190 Hegedüs and Horváth, 2004; Horváth et al., 2002). As predicted by Horváth et al. (2002), our  
191 UV polarimetry data closely resemble those of the human-visible color bands, especially blue,  
192 and are consistent with previous measurements in the human-visible range. Similar to previous  
193 measurements (Grant et al., 1993; Horváth et al., 2002), glossy, flat and/or dark leaf surfaces  
194 have an increased ratio of specular to diffuse reflection and greater *DoLP* than matte, undulating,  
195 and/or bright leaf surfaces. As leaves have low reflectance in the green and red color bands, the  
196 *DoLPs* in the blue and UV color bands expectedly exceeded those in the green and red bands.  
197 Moreover, plants with leaves that tend to be held more vertically (e.g., fall rye, onions), and

198 provide little horizontal surface for specular reflections, had low *DoLP* values. Despite large  
199 differences in leaf shape (simple vs compound) and growth form (all basal leaves vs basal and  
200 cauline leaves), there were only small, albeit statistically significant, differences in *AoP* between  
201 plant species (Table S2). These findings in combination with the smaller interspecific differences  
202 in intensity relative to *DoLP* (Table S2), further support the conclusion that foliar *DoLP* is the  
203 visual cue that conveys the most host plant information, especially information about the foliar  
204 surface (waxes, pubescence, undulations).

205 The angle between light source, plant and observer ( $\omega$ ) strongly predicted the foliar *DoLP*  
206 (Figs. 3, S6, S7) for all color bands, with the strongest polarization at twice the Brewster's angle  
207 ( $53\text{-}60^\circ$ ). These data are consistent with both theoretical predictions and other experimental  
208 measurements of the effect of viewing angles on *DoLP* (Horváth et al., 2002; Raven, 2002;  
209 Rondeaux & Herman, 1991; Woolley, 1971). However, the phenomenon of lowering the *DoLP*  
210 with increasing  $\psi$  had not previously been noted and emerges here through whole-plant  
211 measurements incorporating multiple leaf surfaces. As the orientation of plant leaves is typically  
212 more horizontal than vertical, but not perfectly horizontal, plants lit more from the side than from  
213 above (greater  $\psi$ ) have a relatively greater leaf area shadowed by their own leaves. These  
214 shadowed areas have a lower *DoLP*, lowering the plants' overall *DoLP*. Of course, this  
215 relationship was absent in fall rye (at least at the growth stage examined) with primarily  
216 vertically held leaves. When plants were photographed at or below the level of the leaf canopy  
217 (lower  $\zeta$ ), the *DoLP* was reduced (Figs. 5, S10, S11). Similar to the effect of  $\psi$ , lower  $\zeta$  results in  
218 a smaller leaf surface reflecting light at the observer, and a larger leaf surface being in shadow or  
219 showing light transmitted through the leaves. Light transmitted through leaves has a low *DoLP*

220 due to diffuse scattering by plant tissue, as previously observed in single leaf measurements  
221 (Horváth et al., 2002; Vanderbilt & Grant, 1985).

222 In agreement with prior examinations of foliar polarization, the *AoP* of all color bands was  
223 largely a function of  $\psi$  (Figs. 4, S8, S9), with values of *AoP* moving away from  $90^\circ$  as the light  
224 source was less aligned with the line between the observer and the plant (see Fig. 1a). This  
225 relation between *AoP* and  $\psi$  is consistent with previous observations (Horváth et al., 2002;  
226 Können, 1985). Although the *AoP* of a particular plant area did not change much in relation to  
227 the light source position, the variety of leaf orientations within a single plant and the curvature of  
228 leaf surfaces ensured that at least a portion of the plant showed a specular reflection regardless of  
229 the light source's position relative to the plant. Invariably, these areas of specular reflection  
230 showed a greater *DoLP* accounting for much of the observed relationship between *AoP* and  $\psi$ .  
231 The variety of leaf surface orientations and the resultant *AoPs* also explains why the relationship  
232 between *AoP* and  $\psi$  is shallower than the inversely proportional relationship one could expect.  
233 When plants were viewed with the light source directly in front of the observer ( $\phi = 180^\circ$ ; Figs.  
234 4, S8, S9), the relationship between *AoP* and  $\psi$  had a reduced slope, a phenomenon being more  
235 pronounced when the plant was observed from a higher angle ( $\zeta > 0$ ; Fig. S12). In both cases ( $\phi =$   
236  $180^\circ$ ,  $\zeta > 0$ ), this resulted in plants having a higher overall *DoLP* (Figs. 3, 5), and consequently  
237 less leaf surface area (with a  $< 15\%$  *DoLP*) being excluded from estimations of *AoP*. Given that  
238 less polarized leaf surface areas showed a weaker relationship between *AoP* and  $\psi$ , the overall  
239 lower *DoLP* resulted in a stronger relationship between *AoP* and  $\psi$  as only leaf areas with highest  
240 *DoLP* were above the cutoff. All these effects of  $\psi$  on *AoP* could potentially have biological  
241 relevance if a host plant foraging insect were to weigh observations of *AoP* by their *DoLP* when  
242 determining a plant's overall *AoP*. Nonetheless, in our modeling, these specific effects on *AoP*,

243 and the effects of *AoP* in general, on host plant attractiveness to *P. rapae* seem to be subtle in  
244 comparison to the effects of *DoLP* (Figs. 6, S13).

245 Our modeling of the effect of approach trajectory on visual attractiveness of plants to *P.*  
246 *rapae* revealed that *DoLP* is a much more important determinant of plant attractiveness than *AoP*  
247 (Fig. 6). Approach trajectories resulting in *AoP* unattractive to *P. rapae* were also unattractive  
248 due to low *DoLP*. It follows that the effect of *AoP* on plant attractiveness can largely be  
249 discounted. The key determinant of an attractive *DoLP* was the azimuth of an approach  
250 trajectory relative to the light source ( $\phi$ ). This was due to its effect on  $\psi$ , as plants obliquely lit  
251 even at the Brewster's angle showed a much lower *DoLP*. In fact, the only attractive approach  
252 trajectories were those where the light source was located behind the target plant. *DoLP* and  
253 attractiveness were also affected by how close the angle between observer, plant and light source  
254 ( $\omega$ ) was to twice the Brewster's angle, which is affected by light source elevation ( $\theta$ ), observer  
255 elevation ( $\zeta$ ), and azimuth ( $\phi$ ). However, when the light source was behind the plant, there was  
256 always a combination of  $\theta$  and  $\zeta$  allowing for foliar reflections approaching the Brewster's angle.  
257 Although high solar elevations ( $>75^\circ$ ) – constrained to times near solar noon and limited to  
258 latitudes near the equator – are relatively rare, they would require much lower approach angles  
259 for accurate assessment of foliar *DoLP*. It is the key result of our modelling that for most solar  
260 positions there is a single optimal approach trajectory that would best enable a foraging insect to  
261 assess foliar *DoLP*. However, this conclusion applies only to settings where foliar reflections are  
262 dominated by the specular reflections of sunlight (or another single strong unpolarized light  
263 source), as we took measurements indoors and did not incorporate possible effects of polarized  
264 skylight (Hegedüs & Horváth, 2004; Horváth et al., 2002).

265 We have every reason to predict that our polarization modeling is applicable to the foliar  
266 reflectance of many plant species. However, the data we have obtained with herbaceous  
267 flowering plants may not be applicable to graminoids, such as fall rye, or other plants with more  
268 vertically held leaves. Moreover, due to the size of trees and large shrubs, foraging insects more  
269 often approach them from below (reference), and do not view them in their entirety,  
270 complicating the applicability of our modeling. It would therefore be intriguing to model whether  
271 approach trajectories have similar effects on polarized light cues that may be used by insect  
272 herbivores of trees and shrubs.

273 While this work focused on *P. rapae*, our *DoLP* and *AoP* modeling should be applicable to  
274 other polarization-sensitive visual systems. Furthermore, our prediction of a single optimal  
275 approach trajectory for the discrimination of *DoLP* should hold true for other polarization-  
276 sensitive insects such as *Papilio* butterflies (Kelber et al., 2001; Kinoshita et al., 2011), where  
277 increased *DoLP* of foliar reflections would be expected to have a linear effect on attractiveness  
278 (Blake et al., 2020a). The approach of butterflies to host plants has not yet been well documented  
279 and – accordingly – no stereotyped approach has been noted, as one would anticipate based on  
280 our predictions of polarized reflections. Reminiscent of the plunge responses of *Notonecta*  
281 backswimmers (Schwind, 1984), one might expect an approach where the butterflies' trajectory  
282 is constrained so that at least a portion of the compound eyes are viewing the plant at or near the  
283 Brewster's angle. Alternatively, butterflies might circle plants before landing, thereby shifting  
284 their azimuth relative to sun, and entering and exiting the attractive window we identified.  
285 Circling plants would also allow for sequential comparison of visual information from the plant  
286 surface, aiding in *DoLP* assessment through differences in color and/or intensity (Horváth &  
287 Varjú, 2004). Mapping the position of butterflies in a 3-dimensional space during approaches to

288 host plants would give insight into how these insects perceive and use the plants' polarized light  
289 cues.

290 In conclusion, using photo polarimetry to examine polarized reflections from entire plants,  
291 we show that host and non-host plants of *P. rapae* differ in the *DoLP* of foliar reflections, with  
292 UV measurements closely resembling those of blue. Our photo polarimetry further reveals that  
293 there is a single optimal approach trajectory that would enable a foraging insect (or other  
294 observers) to best discriminate among these interspecific differences in polarization. This  
295 optimal approach trajectory is always in the direction of the light source but its inclination is  
296 dependent upon the elevation of the light source ( $\theta$ ). It would now be intriguing to determine  
297 whether the trajectories of polarization-sensitive insects towards host plants match those  
298 predicted by our models.

## 299 **Acknowledgments**

300 This study was supported by an Alexander Graham Bell Canadian Graduate Scholarship to AJB,  
301 NSERC Undergraduate Student Research Awards to MCG and SC, and by a NSERC-Industrial  
302 Research Chair to GG, with Scotts Canada Ltd. and BASF Canada Ltd. as the industrial partners.

303 **Competing Interests** The NSERC-Industrial Research Chair to GG was supported by Scotts  
304 Canada Ltd. and BASF Canada Ltd. as industrial partners.

305 **Data Accessibility** Data are available from Mendeley Data:

306 <http://doi.org/10.17632/5bh5mhmvrk.1> (Blake et al., 2020b).

307 **Author Contributions** AJB, SC, MCG performed the polarimetry; AJB designed experiments;  
308 AJB performed modeling and analyses; GG supervised the project; AJB wrote the first draft of  
309 the paper and GG provided comments.



## 310 **References**

- 311 Bates, D., Mächler, M., Bolker, B., & Walker, S. (2015). Fitting linear mixed-effects models  
312 using **lme4**. *Journal of Statistical Software*, 67(1), 1–48.  
313 <https://doi.org/10.18637/jss.v067.i01>
- 314 Blake, Adam J., Hahn, G. S., Grey, H., Kwok, S. A., McIntosh, D., & Gries, G. (2020a).  
315 Polarized light sensitivity in *Pieris rapae* is dependent on both color and intensity.  
316 *Journal of Experimental Biology*, 223(13), jeb220350. <https://doi.org/10.1242/jeb.220350>
- 317 Blake, Adam J., Couture, S., Go, M. C., Gries, G. (2020b), Polarimetry data, ImageJ/FIJI  
318 macros, R modeling code, and other data from: Approach trajectory and solar position  
319 affect host plant attractiveness to the small white butterfly, Mendeley Data, V1,  
320 <http://doi.org/10.17632/5bh5mhmvrk.1>
- 321 Blake, Adam J., Pirih, P., Qiu, X., Arikawa, K., & Gries, G. (2019). Compound eyes of the small  
322 white butterfly *Pieris rapae* have three distinct classes of red photoreceptors. *Journal of*  
323 *Comparative Physiology A*, 205(4), 553–565. [https://doi.org/10.1007/s00359-019-01330-](https://doi.org/10.1007/s00359-019-01330-8)  
324 8
- 325 Blake, Adam James, Go, M. C., Hahn, G. S., Grey, H., Couture, S., & Gries, G. (2019).  
326 Polarization of foliar reflectance: novel host plant cue for insect herbivores. *Proceedings*  
327 *of the Royal Society B: Biological Sciences*, 286, 20192198.  
328 <https://doi.org/10.1098/rspb.2019.2198>
- 329 Chew, F. S., & Renwick, J. A. A. (1995). Host plant choice in *Pieris* butterflies. In *Chemical*  
330 *ecology of insects 2* (Vol. 1–Chapter 6, pp. 214–238). Springer.  
331 [https://doi.org/10.1007/978-1-4615-1765-8\\_6](https://doi.org/10.1007/978-1-4615-1765-8_6)

- 332 Coffin, D. (2019, December 23). *Decoding raw digital photos in Linux*.  
333 <https://www.dechifro.org/dcraw/>
- 334 Foster, J. J., Temple, S. E., How, M. J., Daly, I. M., Sharkey, C. R., Wilby, D., & Roberts, N. W.  
335 (2018). Polarisation vision: overcoming challenges of working with a property of light  
336 we barely see. *The Science of Nature*, 105, 27. [https://doi.org/10.1007/s00114-018-1551-](https://doi.org/10.1007/s00114-018-1551-3)  
337 3
- 338 Grant, L., Daughtry, C. S. T., & Vanderbilt, V. C. (1993). Polarized and specular reflectance  
339 variation with leaf surface features. *Physiologia Plantarum*, 88(1), 1–9.  
340 <https://doi.org/10.1111/j.1399-3054.1993.tb01753.x>
- 341 Hegedüs, R., & Horváth, G. (2004). Polarizational colours could help polarization-dependent  
342 colour vision systems to discriminate between shiny and matt surfaces, but cannot  
343 unambiguously code surface orientation. *Vision Research*, 44(20), 2337–2348.  
344 <https://doi.org/10.1016/j.visres.2004.05.004>
- 345 Heinloth, T., Uhlhorn, J., & Wernet, M. F. (2018). Insect responses to linearly polarized  
346 reflections: orphan behaviors without neural circuits. *Frontiers in Cellular Neuroscience*,  
347 12, 50. <https://doi.org/10.3389/fncel.2018.00050>
- 348 Horváth, G., Gál, J., Labhart, T., & Wehner, R. (2002). Does reflection polarization by plants  
349 influence colour perception in insects? Polarimetric measurements applied to a  
350 polarization-sensitive model retina of *Papilio* butterflies. *Journal of Experimental*  
351 *Biology*, 205(21), 3281–3298. <https://jeb.biologists.org/content/205/21/3281>
- 352 Horváth, G., & Varjú, D. (1997). Polarization pattern of freshwater habitats recorded by video  
353 polarimetry in red, green and blue spectral ranges and its relevance for water detection by

- 354 aquatic insects. *Journal of Experimental Biology*, 200(7), 1155–1163.  
355 <https://jeb.biologists.org/content/200/7/1155>
- 356 Horváth, Gábor, & Hegedüs, R. (2014). Polarization Characteristics of Forest Canopies with  
357 Biological Implications. In Gábor Horváth (Ed.), *Polarized Light and Polarization Vision*  
358 *in Animal Sciences* (pp. 345–365). Springer Berlin Heidelberg.  
359 [https://doi.org/10.1007/978-3-642-54718-8\\_17](https://doi.org/10.1007/978-3-642-54718-8_17)
- 360 Horváth, Gábor, & Varjú, D. (2004). *Polarized Light in Animal Vision: Polarization Patterns in*  
361 *Nature*. Springer.
- 362 Ilić, M., Pirih, P., & Belušič, G. (2016). Four photoreceptor classes in the open rhabdom eye of  
363 the red palm weevil, *Rynchophorus ferrugineus* Olivier. *Journal of Comparative*  
364 *Physiology A*, 202(3), 203–213. <https://doi.org/10.1007/s00359-015-1065-9>
- 365 Johnsen, S. (2011). *The Optics of Life*. Princeton University Press.  
366 <http://lib.myilibrary.com.proxy.lib.sfu.ca/Open.aspx?id=343974>
- 367 Kelber, A., Thunell, C., & Arikawa, K. (2001). Polarisation-dependent colour vision in *Papilio*.  
368 *Journal of Experimental Biology*, 204(14), 2469–2480. [https://jeb-biologists-](https://jeb-biologists-org.proxy.lib.sfu.ca/content/204/14/2469.short)  
369 [org.proxy.lib.sfu.ca/content/204/14/2469.short](https://jeb-biologists-org.proxy.lib.sfu.ca/content/204/14/2469.short)
- 370 Kinoshita, M., Yamazato, K., & Arikawa, K. (2011). Polarization-based brightness  
371 discrimination in the foraging butterfly, *Papilio xuthus*. *Philosophical Transactions of the*  
372 *Royal Society B: Biological Sciences*, 366(1565), 688–696.  
373 <https://doi.org/10.1098/rstb.2010.0200>
- 374 Koller, D. (2000). Plants in search of sunlight. In *Advances in Botanical Research* (Vol. 33, pp.  
375 35–131). Elsevier. [https://doi.org/10.1016/S0065-2296\(00\)33041-5](https://doi.org/10.1016/S0065-2296(00)33041-5)

- 376 Können, G. P. (1985). *Polarized Light in Nature*. Cambridge University Press.
- 377 [https://books.google.ca/books?id=OBY9AAAAIAAJ&lpg=PP1&dq=Polarized%20Light](https://books.google.ca/books?id=OBY9AAAAIAAJ&lpg=PP1&dq=Polarized%20Light%20in%20Nature%201985)
- 378 [%20in%20Nature%201985](https://books.google.ca/books?id=OBY9AAAAIAAJ&lpg=PP1&dq=Polarized%20Light%20in%20Nature%201985)
- 379 Labhart, T., & Meyer, E. P. (1999). Detectors for polarized skylight in insects: a survey of
- 380 ommatidial specializations in the dorsal rim area of the compound eye. *Microscopy*
- 381 *Research & Technique*, 47(6), 368–379. [https://doi.org/10.1002/\(SICI\)1097-](https://doi.org/10.1002/(SICI)1097-0029(19991215)47:6<368::AID-JEMT2>3.0.CO;2-Q)
- 382 [0029\(19991215\)47:6<368::AID-JEMT2>3.0.CO;2-Q](https://doi.org/10.1002/(SICI)1097-0029(19991215)47:6<368::AID-JEMT2>3.0.CO;2-Q)
- 383 Maignan, F., Bréon, F.-M., Fédèle, E., & Bouvier, M. (2009). Polarized reflectances of natural
- 384 surfaces: Spaceborne measurements and analytical modeling. *Remote Sensing of*
- 385 *Environment*, 113(12), 2642–2650. <https://doi.org/10.1016/j.rse.2009.07.022>
- 386 Mishra, M. (2015). An eye ultrastructure investigation of a plant pest *Acyrtosiphon pisum*
- 387 (Harris) (Insecta: Hemiptera: Aphididae). *Open Access Insect Physiology*, 5, 41–46.
- 388 <https://doi.org/10.2147/OAIP.S84633>
- 389 Qiu, X., Vanhoutte, K., Stavenga, D. G., & Arikawa, K. (2002). Ommatidial heterogeneity in the
- 390 compound eye of the male small white butterfly, *Pieris rapae crucivora*. *Cell and Tissue*
- 391 *Research*, 307(3), 371–379. <https://doi.org/10.1007/s00441-002-0517-z>
- 392 Raven, P. N. (2002). Polarized directional reflectance from laurel and mullein leaves. *Optical*
- 393 *Engineering*, 41(5), 1002–1011. <https://doi.org/10.1117/1.1467668>
- 394 Rondeaux, G., & Herman, M. (1991). Polarization of light reflected by crop canopies. *Remote*
- 395 *Sensing of Environment*, 38(1), 63–75. [https://doi.org/10.1016/0034-4257\(91\)90072-E](https://doi.org/10.1016/0034-4257(91)90072-E)
- 396 Schindelin, J., Arganda-Carreras, I., Frise, E., Kaynig, V., Longair, M., Pietzsch, T., Preibisch,
- 397 S., Rueden, C., Saalfeld, S., Schmid, B., Tinevez, J.-Y., White, D. J., Hartenstein, V.,
- 398 Eliceiri, K., Tomancak, P., & Cardona, A. (2012). Fiji: an open-source platform for

- 399 biological-image analysis. *Nature Methods*, 9(7), 676–682.  
400 <https://doi.org/10.1038/nmeth.2019>
- 401 Schwind, R. (1984). The plunge reaction of the backswimmer *Notonecta glauca*. *Journal of*  
402 *Comparative Physiology A*, 155(3), 319–321. <https://doi.org/10.1007/BF00610585>
- 403 Thévenaz, P., Ruttimann, U. E., & Unser, M. (1998). A pyramid approach to subpixel  
404 registration based on intensity. *IEEE Transactions on Image Processing : A Publication*  
405 *of the IEEE Signal Processing Society*, 7(1), 27–41. <https://doi.org/10.1109/83.650848>
- 406 Vanderbilt, V., & Grant, L. (1985). Plant canopy specular reflectance model. *IEEE Transactions*  
407 *on Geoscience and Remote Sensing*, GE-23(5), 722–730.  
408 <https://doi.org/10.1109/TGRS.1985.289390>
- 409 Wachmann, E. (1977). Vergleichende Analyse der feinstrukturellen Organisation offener  
410 Rhabdome in den Augen der Cucujiformia (Insecta, Coleoptera), unter besonderer  
411 Berücksichtigung der Chrysomelidae. *Zoomorphologie*, 88(2), 95–131.  
412 <https://doi.org/10.1007/BF01880649>
- 413 Wehner, R., & Bernard, G. D. (1993). Photoreceptor twist: a solution to the false-color problem.  
414 *Proceedings of the National Academy of Sciences*, 90(9), 4132–4135.  
415 <https://doi.org/10.1073/pnas.90.9.4132>
- 416 Woolley, J. T. (1971). Reflectance and transmittance of light by leaves. *Plant Physiology*, 47(5),  
417 656–662. <https://doi.org/10.1104/pp.47.5.656>  
418

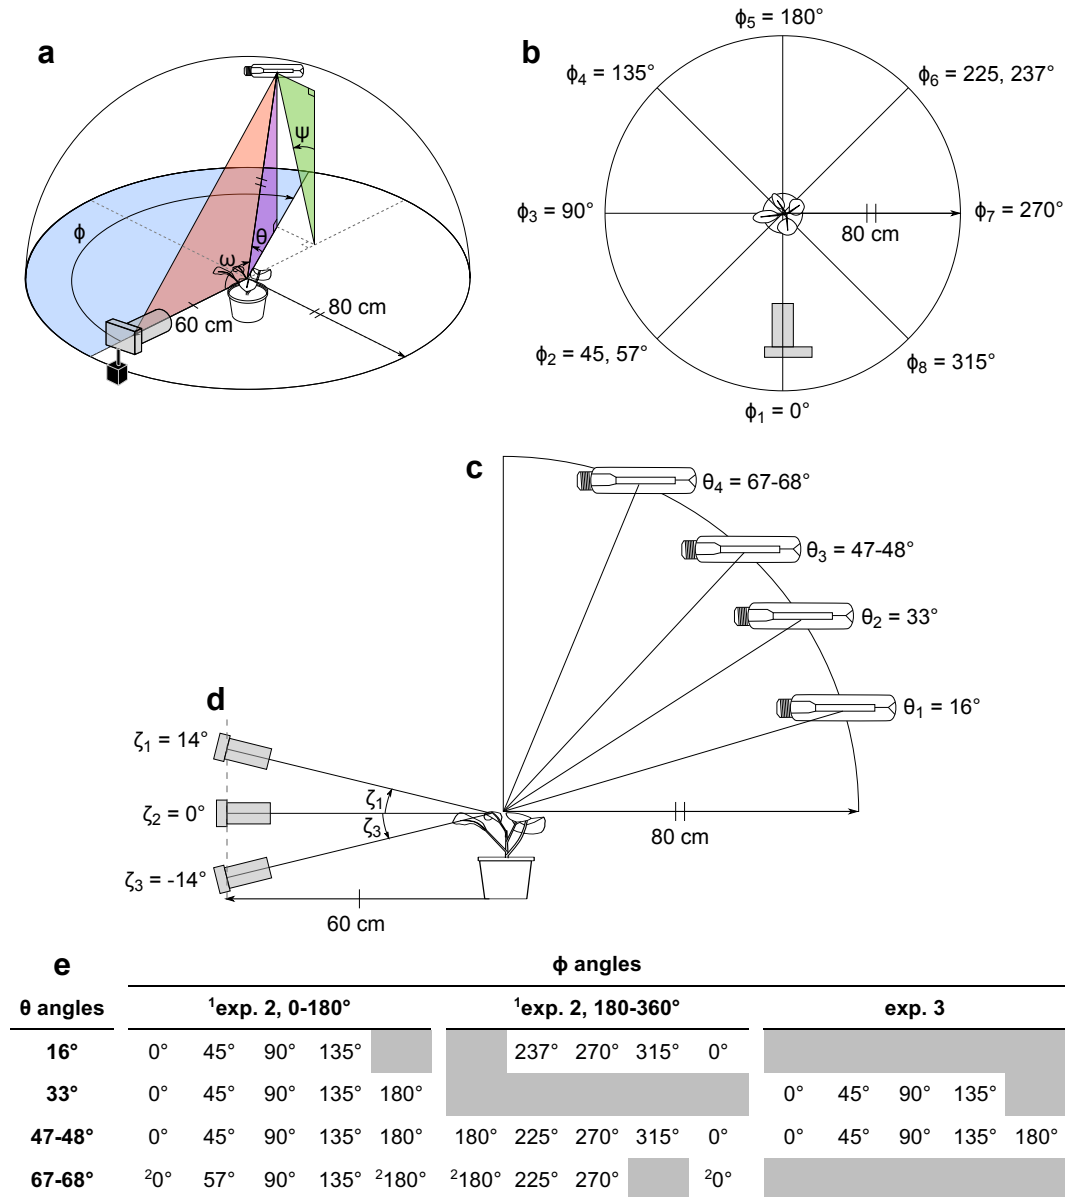

**Figure 1.** **a** Diagram showing the relative position of the camera, experimental plant and light source as well as the angles between them. The differences in azimuth between the camera and the light source ( $\phi$ ), and the elevation of the light source ( $\theta$ ), were manipulated to produce a range of values in the angles  $\omega$  &  $\psi$ . — **b** The range of values for the angle  $\phi$ . — **c** The range of values for the angle  $\theta$ . — **d** The range of values of camera inclination ( $\zeta$ ). — **e** The degree of linear polarization (*DoLP*) and axis of polarization (*AoP*) were measured using photo polarimetry at each combination of  $\phi$  and  $\theta$  angles listed in the table for experiments 2 and 3. Due to restrictions of the scaffolding for mounting the metal halide lamp, certain combinations of  $\phi$  and  $\theta$  were impractical for polarimetry (shown in dark grey). For similar reasons, measurements in experiment 3 were limited to a subset of  $\theta$  angles, but for each of the  $\phi$  and  $\theta$  combinations listed in the table, measurements were taken at each  $\zeta$  value. <sup>1</sup>In experiment 2, plants were either photographed at a  $\phi$  between 0-180° or 180-360°. <sup>2</sup>Due to low *DoLP*, these combinations were excluded from *AoP* analyses.

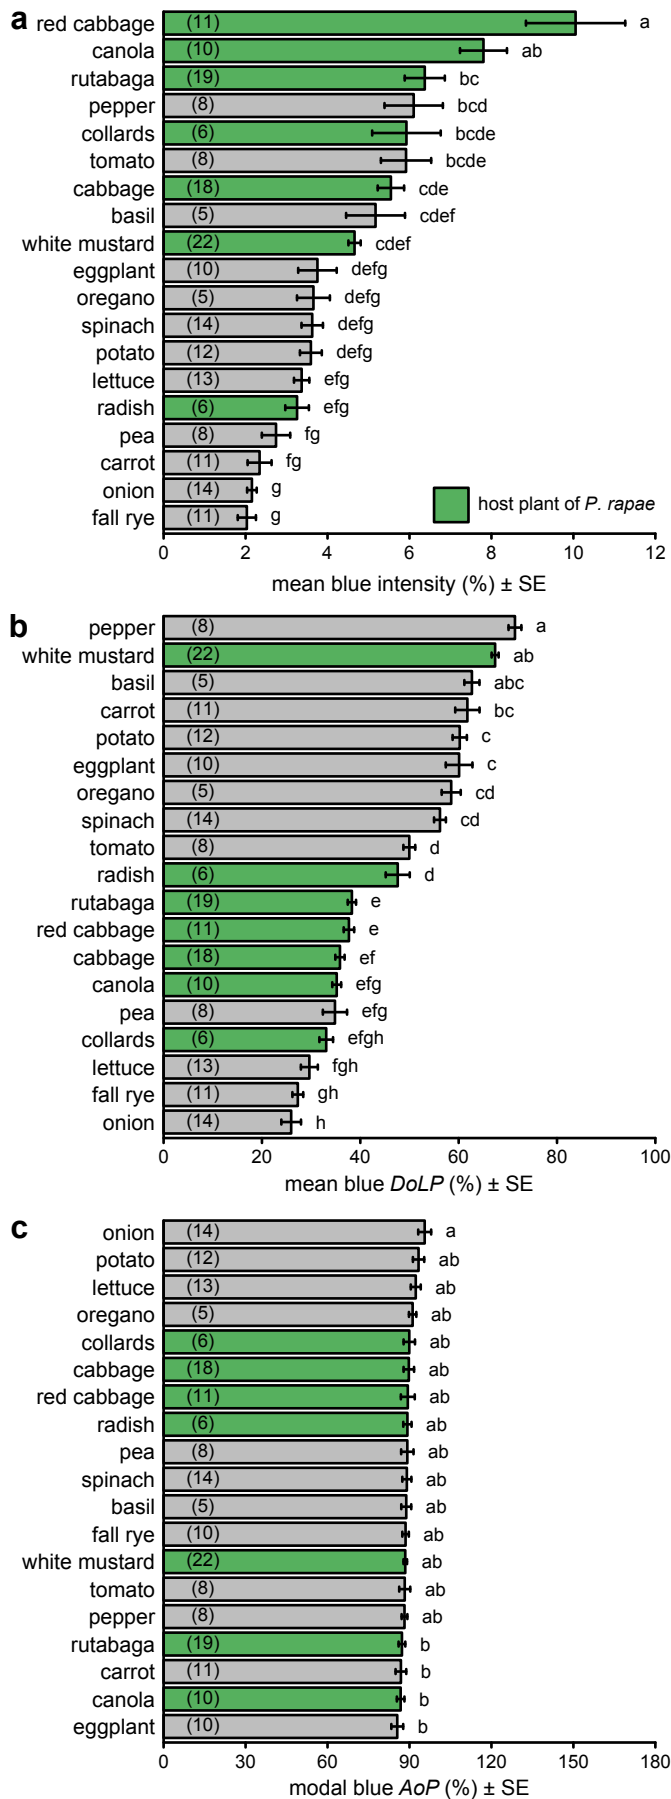

**Figure 2.** Comparison of intensity (a), degree of linear polarization (*DoLP*) (b), and axis of polarization (*AoP*) (c) among host plants (green bars) and non-host plants (grey bars) of *Pieris rapae*. These measurements used the blue color band, whereas measurements with other color bands are presented in Figs. S3-5. Bars show mean or modal values with the number of plants measured noted in parentheses in each bar. In each subpanel, bars with different letters differ statistically ( $p < 0.05$ ), as determined by a post-hoc Tukey test. Data in subpanels b and c were previously reported (Blake et al. 2019).

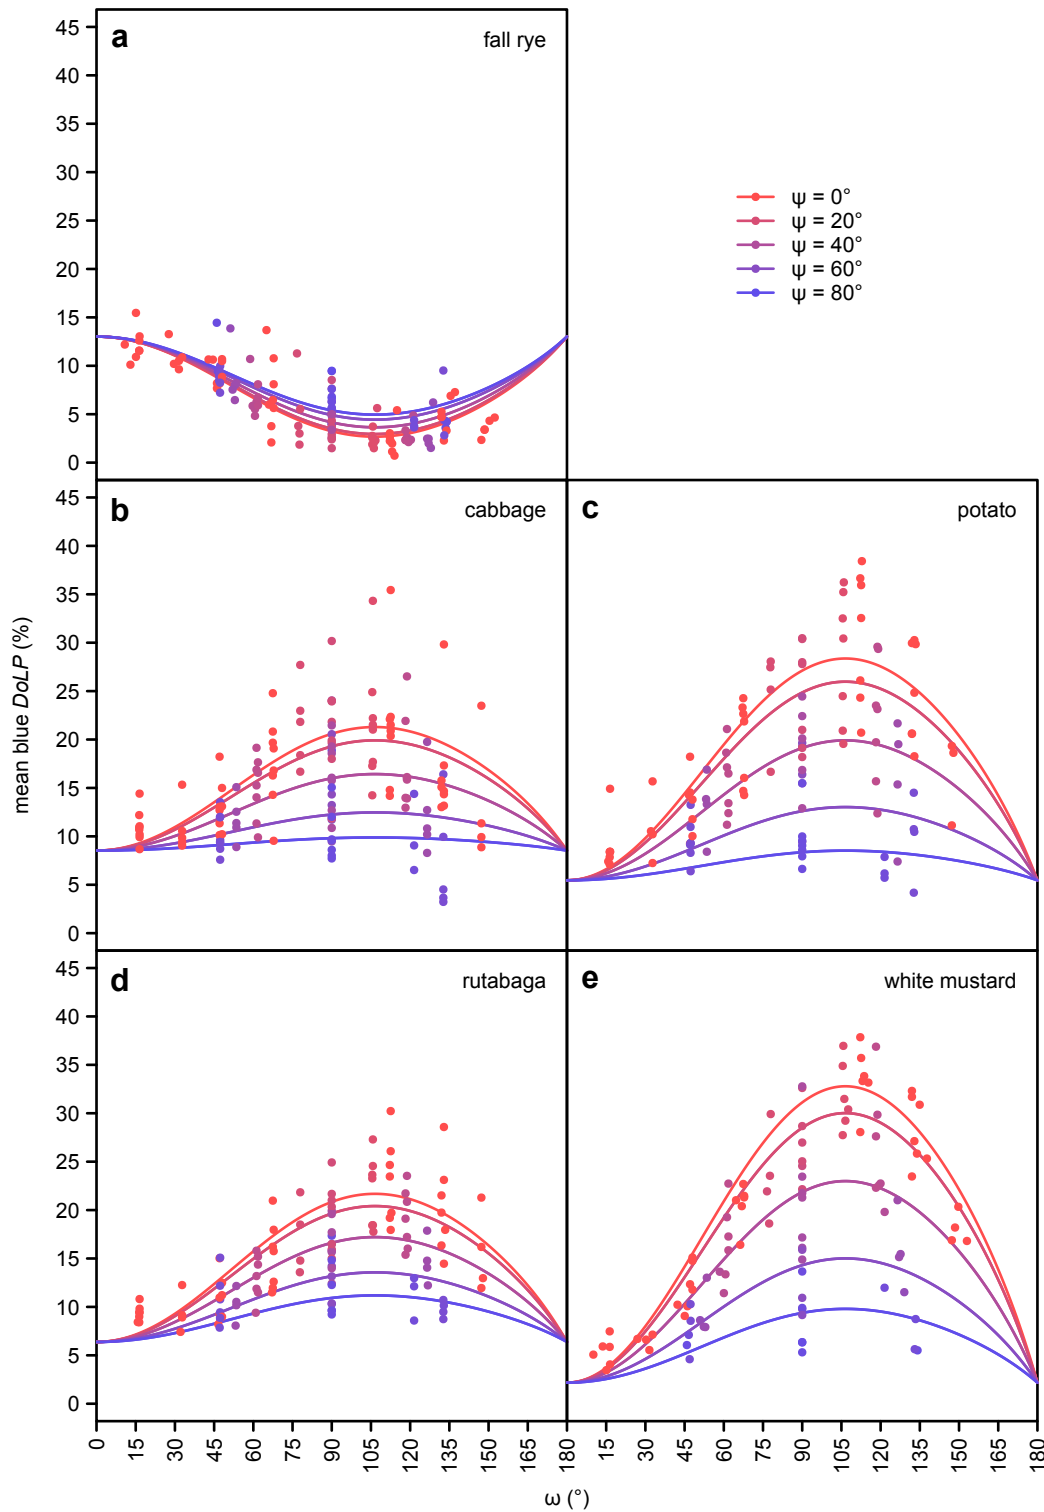

**Figure 3.** The effect of  $\omega$  (angle between observer and light source with the plant at its vertex; see Fig. 1) and  $\psi$  (2-dimensional component of  $\omega$  perpendicular to the plane passing through both the observer and the plant; see Fig. 1) on the mean degree of linear polarization (*DoLP*) of the blue color band, as measured in five select plant species using photo polarimetry. Data with other color bands are presented in Figs. S6-7 and show a similar relationship. Cabbage, rutabaga and white mustard are host plants of *Pieris rapae*.



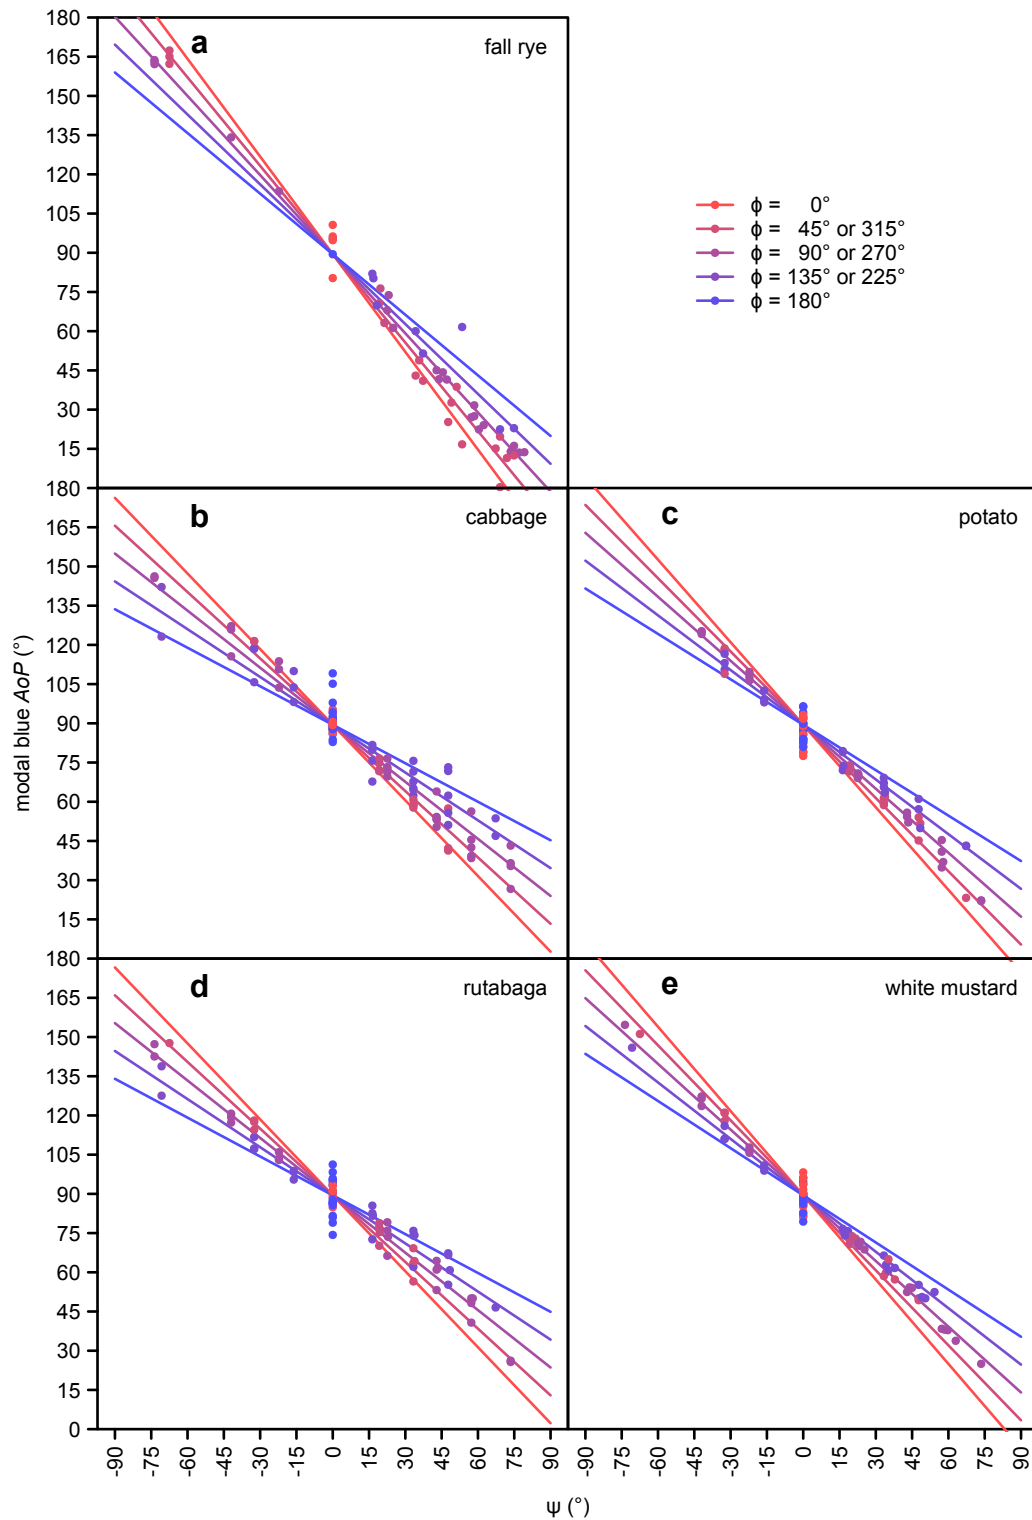

**Figure 4.** The effect of  $\psi$  (2-dimensional component of  $\omega$  perpendicular to the plane passing through both the observer and the plant; see Fig. 1) and  $\phi$  (angle between the azimuth of the observer and the light source; see Fig. 1) on the modal axis of polarization (*AoP*) of the blue color band, as measured in five select plant species using photo polarimetry. Data of other color bands are presented in Figs. S8-9 and show a similar relationship. Cabbage, rutabaga and white mustard are host plants of *Pieris rapae*.

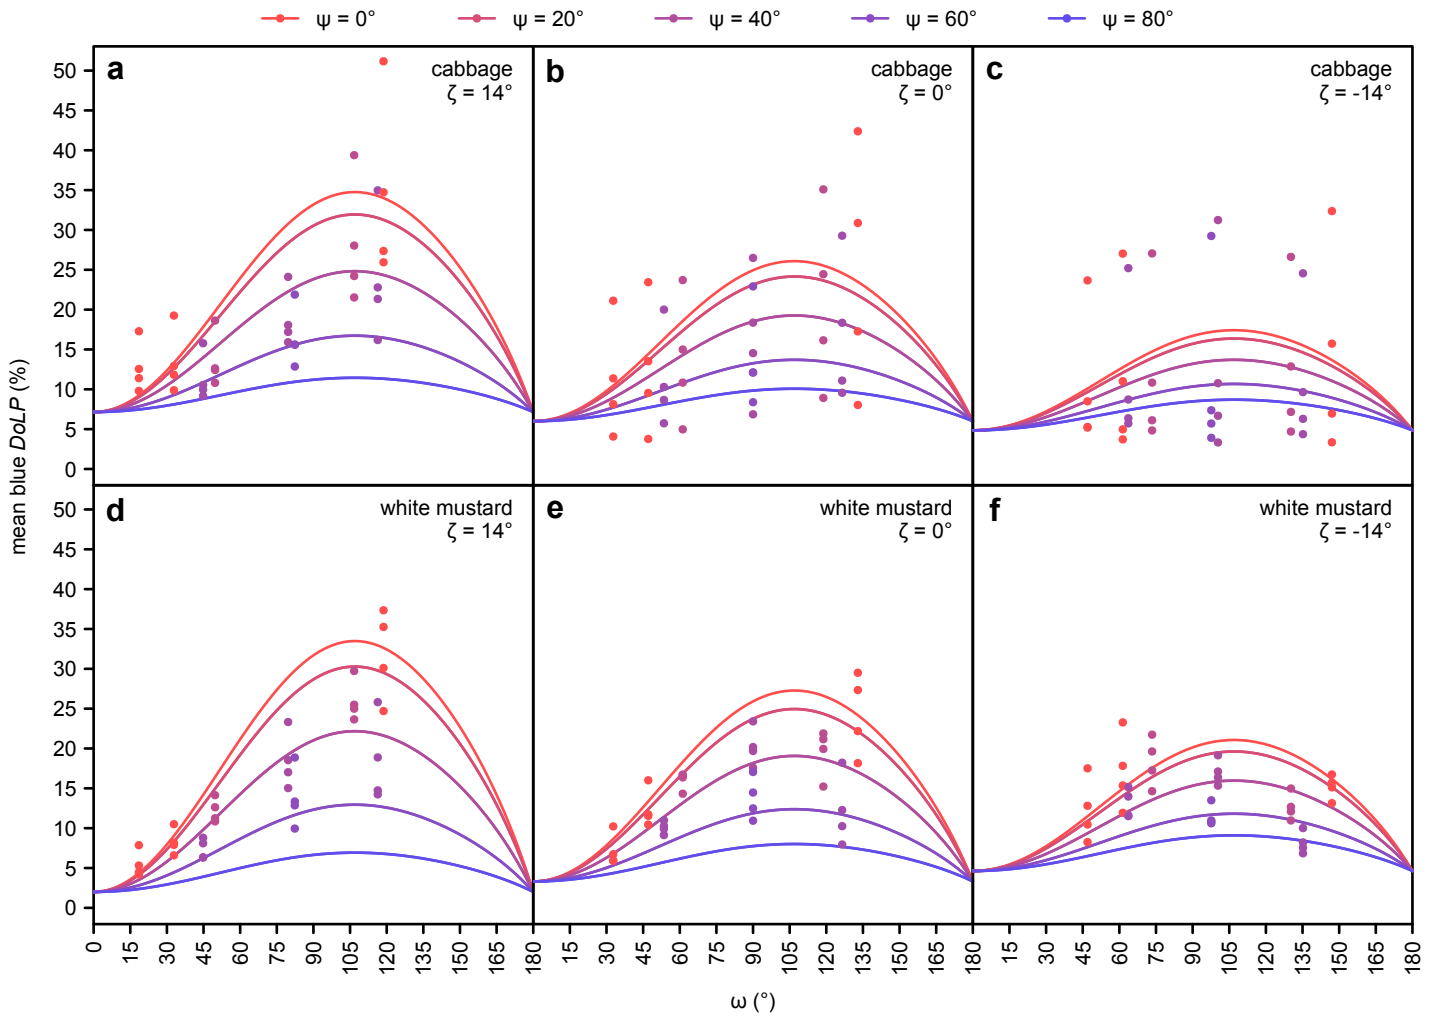

**Figure 5.** The additional effect of observer elevation ( $\zeta$ ; see Fig. 1) on the mean degree of linear polarization (*DoLP*) of the blue color band, as measured in cabbage and white mustard (host plants of *Pieris rapae*) using photo polarimetry. Data with other color bands are presented in Figs. S10-11 and show a similar relationship.

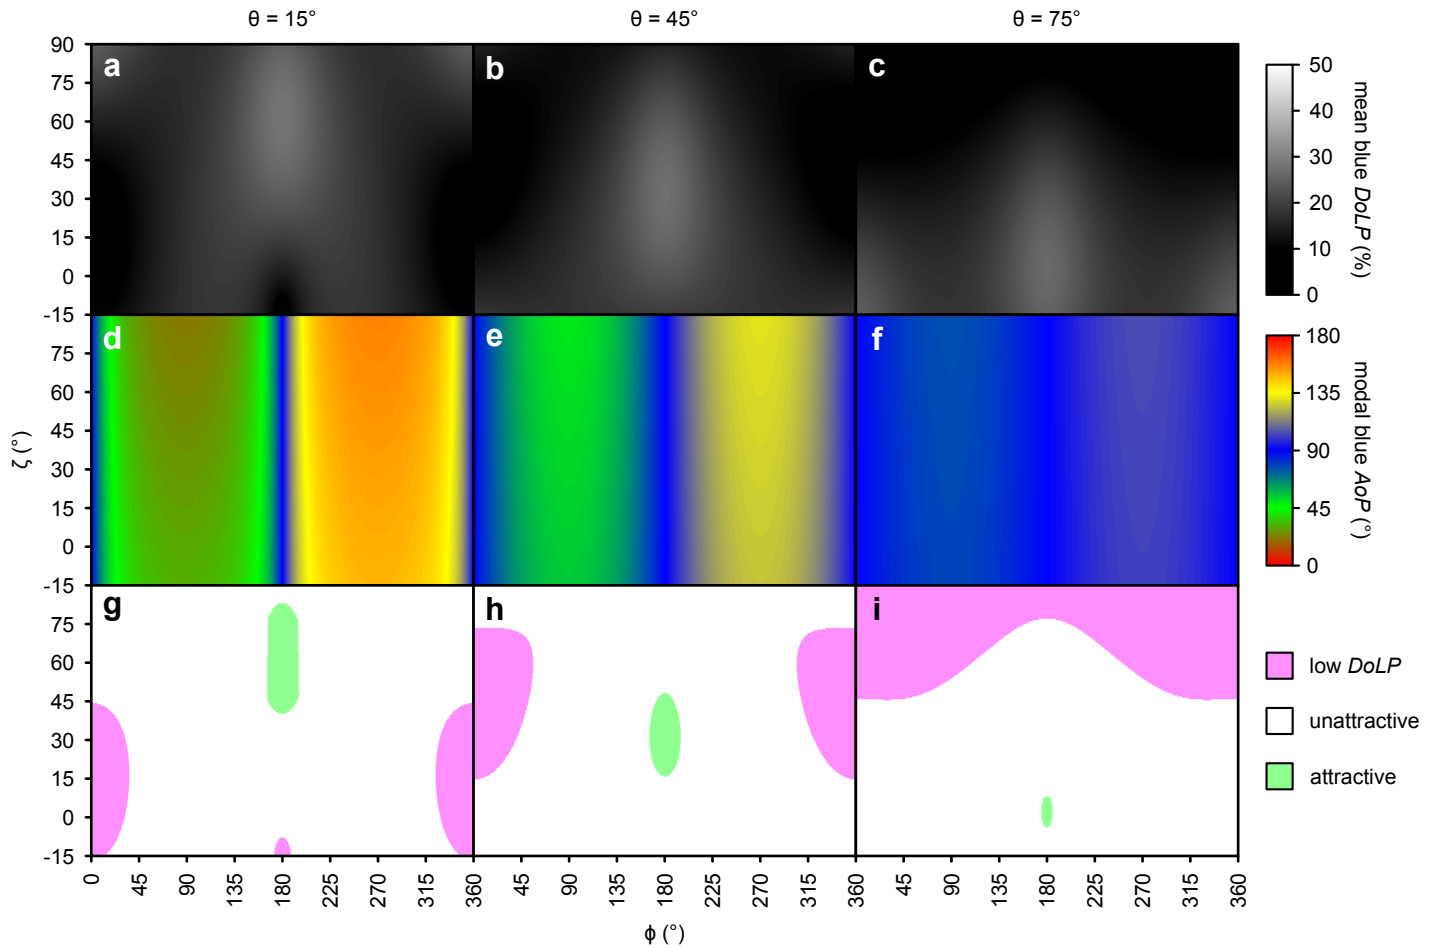

**Figure 6.** Effects of approach direction (angle between the azimuth of the observer and the light source ( $\phi$ ; see Fig. 1) and elevation of the observer ( $\zeta$ ; see Fig. 1) on the mean degree of linear polarization (*DoLP*) (**a-c**) and the modal axis of polarization (*AoP*) (**d-f**) of the blue color band of cabbage plants (host of *Pieris rapae*). Attractiveness of resulting polarization characteristics to *P. rapae* (**g-i**), based on a previous behavioral study (Blake et al. 2019). Approach trajectories resulting in attractive characteristics (*DoLP* = 26-36% and *AoP* = 0-38, 53-128 or 143-180°) and unattractive characteristics (*DoLP* = 10-26% or *AoP* = 38-53°, 128-143°) are shown in green and white, respectively, with pink indicating trajectories resulting in a moderately-attractive low *DoLP* (<10%). Higher *DoLP* (36-60%) would also be unattractive but were not predicted by these models. These effects changed with light source elevation ( $\theta$ ; see Fig. 1) which is shown at 15° (**a, d, g**), 45° (**b, e, h**) and 75° (**c, f, i**). Analogous data were obtained with white mustard (Fig. S13), another host plant of *Pieris rapae*.

**Table S1.** Variety and taxonomic information of select host plants (green) and non-host plants (black) of *Pieris rapae*.

| common name   | latin name                                                       | variety                | family         |
|---------------|------------------------------------------------------------------|------------------------|----------------|
| onion         | <i>Allium cepa</i> L.                                            | Early Yellow Globe     | Amaryllidaceae |
| fall rye      | <i>Secale cereale</i> L.                                         | -                      | Poaceae        |
| pea           | <i>Pisum sativum</i> L.                                          | Green Arrow            | Fabaceae       |
| radish        | <i>Raphanus raphanistrum</i> L. <i>sativus</i>                   | Cherry Belle           | Brassicaceae   |
| rutabaga      | <i>Brassica napus</i> L. var. <i>napobrassica</i>                | Laurentian Swede       | Brassicaceae   |
| canola        | <i>Brassica napus</i> L. <i>napus</i> f. <i>annua</i>            | Q2                     | Brassicaceae   |
| collards      | <i>Brassica oleracea</i> L. var. <i>acephala</i>                 | Vates                  | Brassicaceae   |
| cabbage       | <i>Brassica oleracea</i> L. var. <i>capitata</i> f. <i>alba</i>  | Early Jersey Wakefield | Brassicaceae   |
| red cabbage   | <i>Brassica oleracea</i> L. var. <i>capitata</i> f. <i>rubra</i> | Red Acre               | Brassicaceae   |
| white mustard | <i>Sinapis alba</i> L.                                           | AC Pennant             | Brassicaceae   |
| spinach       | <i>Spinacia oleracea</i> L.                                      | King of Denmark        | Amaranthaceae  |
| lettuce       | <i>Lactuca sativa</i> L.                                         | Grand Rapids           | Asteraceae     |
| carrot        | <i>Daucus carota</i> L. <i>sativus</i>                           | Nantes Coreless        | Apiaceae       |
| basil         | <i>Ocimum basilicum</i> L.                                       | Genovese               | Lamiaceae      |
| oregano       | <i>Origanum vulgare</i> L.                                       | -                      | Lamiaceae      |
| eggplant      | <i>Solanum melongena</i> L.                                      | Black Beauty           | Solanaceae     |
| pepper        | <i>Capsicum annuum</i> L.                                        | Keystone Resistant     | Solanaceae     |
| tomato        | <i>Solanum lycopersicum</i> L.                                   | Celebrity              | Solanaceae     |
| potato        | <i>Solanum tuberosum</i> L.                                      | Russett Burbank        | Solanaceae     |

**Table S2.** Model statements, test statistics, and p-values for statistical models of photo polarimetry determined measurements of intensity ( $I$ ), degree of linear polarization ( $DoLP$ ), and axis of polarization ( $AoP$ ) for the red (R), green (G), blue (B), ultraviolet (UV, Exp. 1 only) color bands in experiments 1-3. The angles ( $\phi$ ,  $\theta$ ,  $\omega$ ,  $\psi$ ,  $\zeta$ ) in the model statements are described in Fig. 1. The  $p(\omega)$  relationship is defined in equations 1-3. The fixed effect of different plant species in the model is represented by *species*, whereas the random effect of individual plants was fit as an intercept and is represented by (1 | plant). The full R code used for statistical analysis is presented in an associated Dryad dataset (Blake et al., 2020b).

| experiment 1             |       |        |           |  |
|--------------------------|-------|--------|-----------|--|
| model statement          | $F$   | df     | $P$ value |  |
| $I_R \sim species$       | 14.95 | 18,192 | < 0.0001  |  |
| $I_G \sim species$       | 15.67 | 18,192 | < 0.0001  |  |
| $I_B \sim species$       | 19.35 | 18,192 | < 0.0001  |  |
| $I_{UV} \sim species$    | 16.34 | 18,192 | < 0.0001  |  |
| $DoLP_R \sim species$    | 21.87 | 18,191 | < 0.0001  |  |
| $DoLP_G \sim species$    | 21.43 | 18,192 | < 0.0001  |  |
| $DoLP_B \sim species$    | 97.93 | 18,192 | < 0.0001  |  |
| $DoLP_{UV} \sim species$ | 72.79 | 18,181 | < 0.0001  |  |
| $AoP_R \sim species$     | 1.76  | 18,186 | 0.0334    |  |
| $AoP_G \sim species$     | 0.83  | 18,188 | 0.6625    |  |
| $AoP_B \sim species$     | 1.89  | 18,191 | 0.0186    |  |
| $AoP_{UV} \sim species$  | 1.02  | 18,176 | 0.4454    |  |

  

| experiment 2                                                                                                                        |          |    |           |  |
|-------------------------------------------------------------------------------------------------------------------------------------|----------|----|-----------|--|
| model statement                                                                                                                     | $\chi^2$ | df | $P$ value |  |
| $DoLP_R \sim p(\omega) + species + p(\omega) : species + p(\omega) : \cos \psi^2 + p(\omega) : species : \cos \psi^2 + (1   plant)$ | 1049     | 14 | < 0.0001  |  |
| $DoLP_G \sim p(\omega) + species + p(\omega) : species + p(\omega) : \cos \psi^2 + p(\omega) : species : \cos \psi^2 + (1   plant)$ | 1059     | 14 | < 0.0001  |  |
| $DoLP_B \sim p(\omega) + species + p(\omega) : species + p(\omega) : \cos \psi^2 + p(\omega) : species : \cos \psi^2 + (1   plant)$ | 1073     | 14 | < 0.0001  |  |
| $AoP_R \sim \psi + \psi : \phi + \psi : species + (1   plant)$                                                                      | 912      | 5  | < 0.0001  |  |
| $AoP_G \sim \psi + \psi : \phi + \psi : species + (1   plant)$                                                                      | 801      | 5  | < 0.0001  |  |
| $AoP_B \sim \psi + \psi : \phi + \psi : species + (1   plant)$                                                                      | 1267     | 6  | < 0.0001  |  |

  

| experiment 3                                                                                                                                                                                                                                 |          |    |           |  |
|----------------------------------------------------------------------------------------------------------------------------------------------------------------------------------------------------------------------------------------------|----------|----|-----------|--|
| model statement                                                                                                                                                                                                                              | $\chi^2$ | df | $P$ value |  |
| $DoLP_R \sim p(\omega) + species + atan(16 \cdot \zeta) + p(\omega) * species + p(\omega) : \cos \psi^2 + species : atan(16 \cdot \zeta) + p(\omega) : species : \cos \psi^2 + p(\omega) : atan(16 \cdot \zeta) : \cos \psi^2 + (1   plant)$ | 342      | 8  | < 0.0001  |  |
| $DoLP_G \sim p(\omega) + species + atan(16 \cdot \zeta) + p(\omega) * species + p(\omega) : \cos \psi^2 + species : atan(16 \cdot \zeta) + p(\omega) : species : \cos \psi^2 + p(\omega) : atan(16 \cdot \zeta) : \cos \psi^2 + (1   plant)$ | 386      | 8  | < 0.0001  |  |
| $DoLP_B \sim p(\omega) + species + atan(16 \cdot \zeta) + p(\omega) * species + p(\omega) : \cos \psi^2 + species : atan(16 \cdot \zeta) + p(\omega) : species : \cos \psi^2 + p(\omega) : atan(16 \cdot \zeta) : \cos \psi^2 + (1   plant)$ | 284      | 8  | < 0.0001  |  |
| $AoP_R \sim \psi + \psi : \phi + \psi : atan(16 \cdot \zeta) + \psi : species + \psi : \phi : atan(16 \cdot \zeta) + \psi : species : atan(16 \cdot \zeta) + (1   plant)$                                                                    | 419      | 6  | < 0.0001  |  |

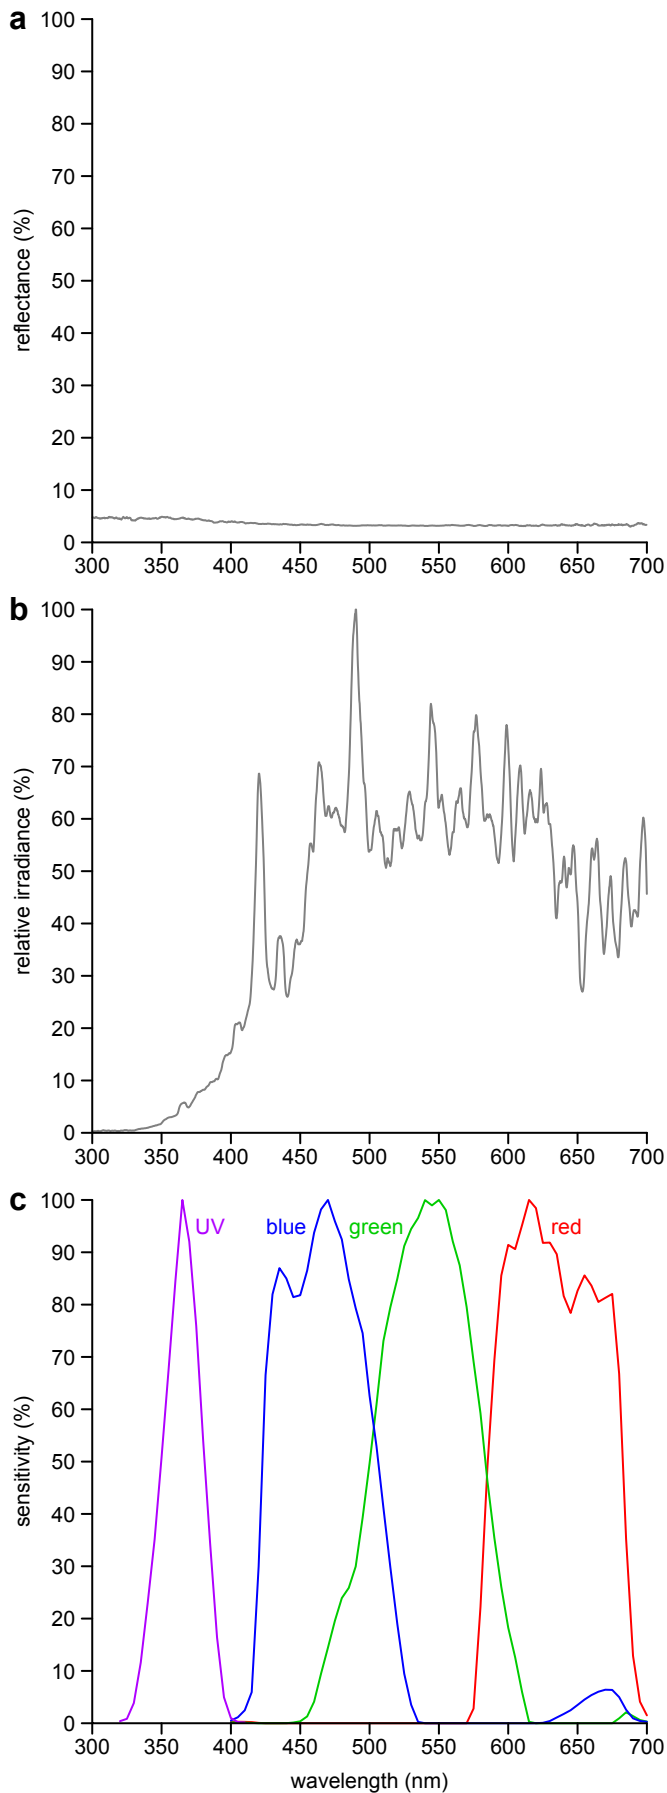

**Figure S1.** Spectra of background, illumination sources, and camera sensitivity. **a**, Reflection spectrum of the black velvet background. **b**, Relative irradiance of the metal halide lamp. **c**, Spectral sensitivity of the modified Olympus E-PM1 camera in the ultraviolet (UV), blue, green and red bands of the electromagnetic spectrum. Reflectance spectra were measured with a JAZ spectrometer (Ocean Optics Inc., Dunedin, FL, USA) calibrated with a 99% Spectralon reflectance standard (SRS-99-010, Labsphere, NH, USA). Irradiance spectra were measured with a calibrated HR-4000 spectrophotometer (Ocean Optics Inc.). Isoquantal monochromatic light for spectral sensitivity determination was generated with the same HR-4000 spectrophotometer and a scanning monochromator (MonoScan 2000, Mikropak GmbH, Ostfildern, Germany).

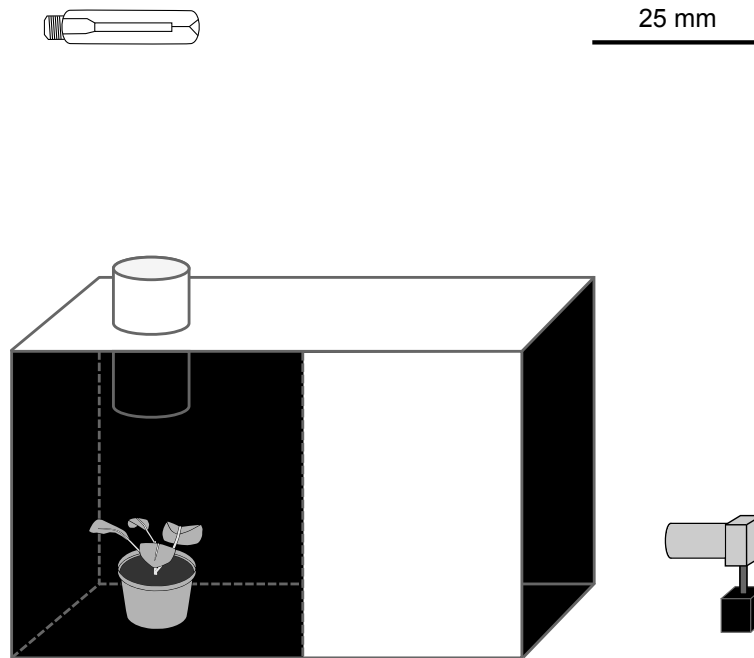

**Figure S2.** Design for photo polarimetry deployed to characterize the intensity, degree, and axis of linear polarization of various host and non-host plants of *Pieris rapae* in the red, green, blue, and ultraviolet color bands. The camera was positioned so that its optical axis was level with the plant canopy. The plant was positioned underneath the spotlight to avoid illumination of box walls. The angle between the camera and the light source was approximately  $90^\circ$ .

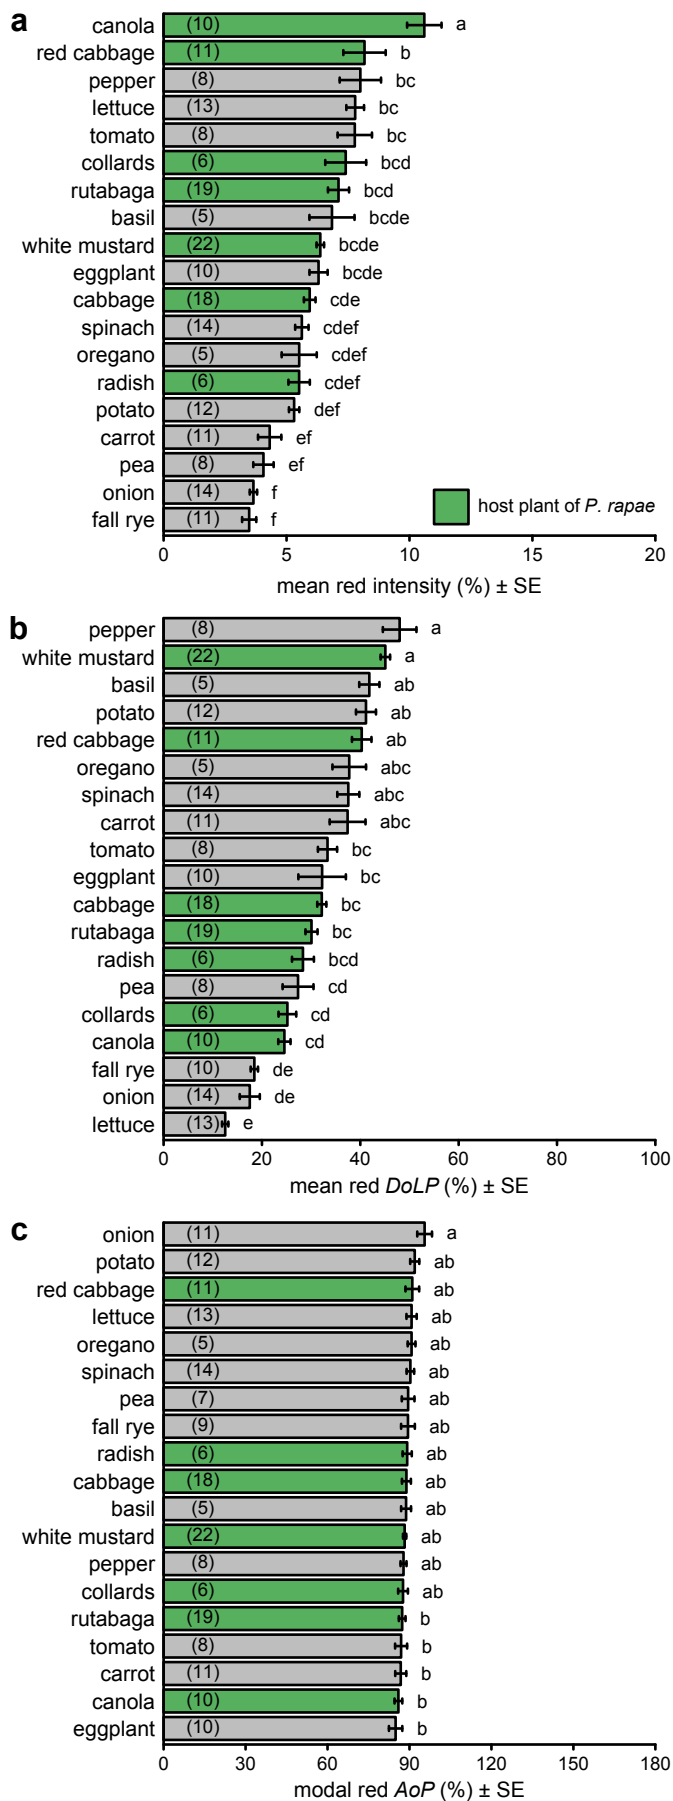

**Figure S3.** Comparison of intensity (a), degree of linear polarization (*DoLP*) (b), and axis of polarization (*AoP*) (c) among host plants (green bars) and non-host plants (grey bars) of *Pieris rapae*. These measurements used the red color band. Bars show mean or modal values with number of plants measured noted in parentheses in each bar. Bars with different letters differ statistically ( $p < 0.05$ ), as determined by a post-hoc Tukey test.



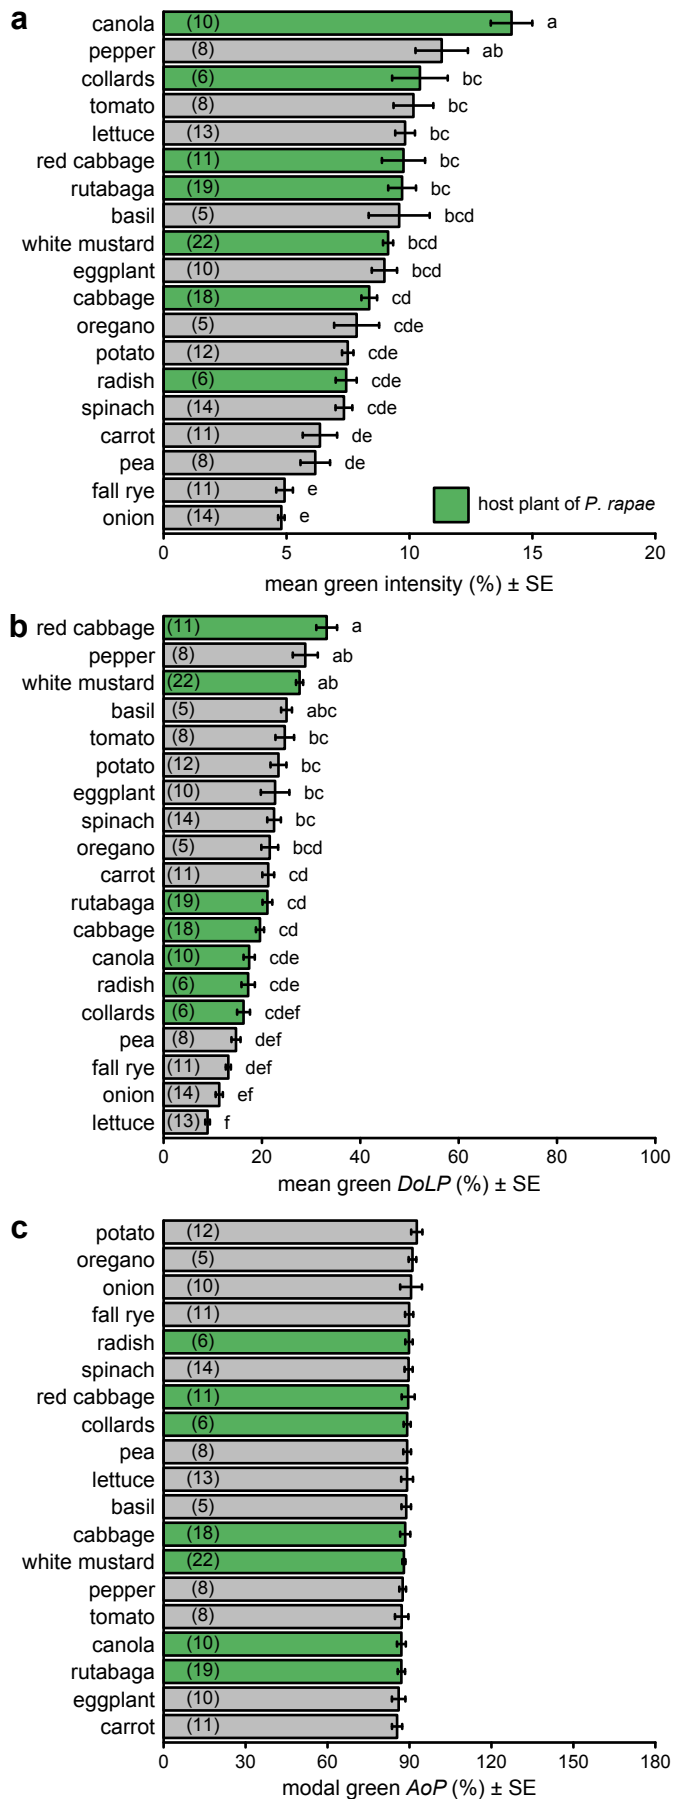

**Figure S4.** Comparison of intensity (a), degree of linear polarization (*DoLP*) (b), and axis of polarization (*AoP*) (c) among host plants (green bars) and non-host plants (grey bars) of *Pieris rapae*. These measurements used the green color band. Bars show mean or modal values with number of plants measured noted in parentheses in each bar. Bars with different letters differ statistically ( $p < 0.05$ ), as determined by a post-hoc Tukey test.

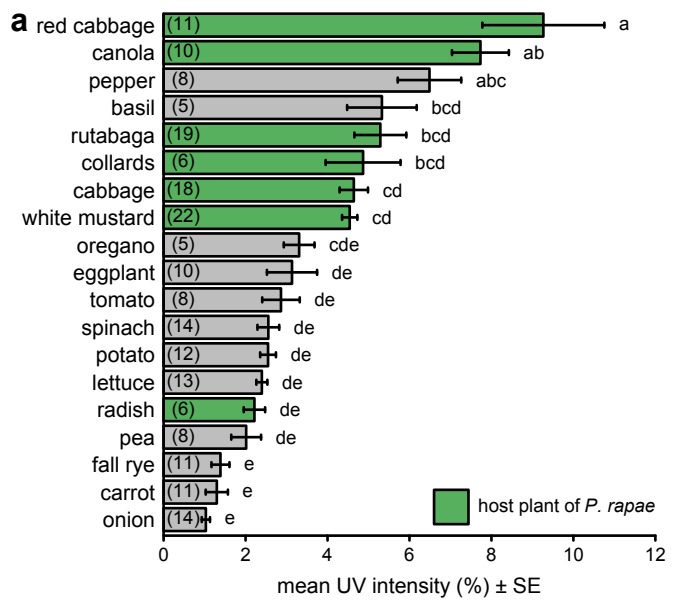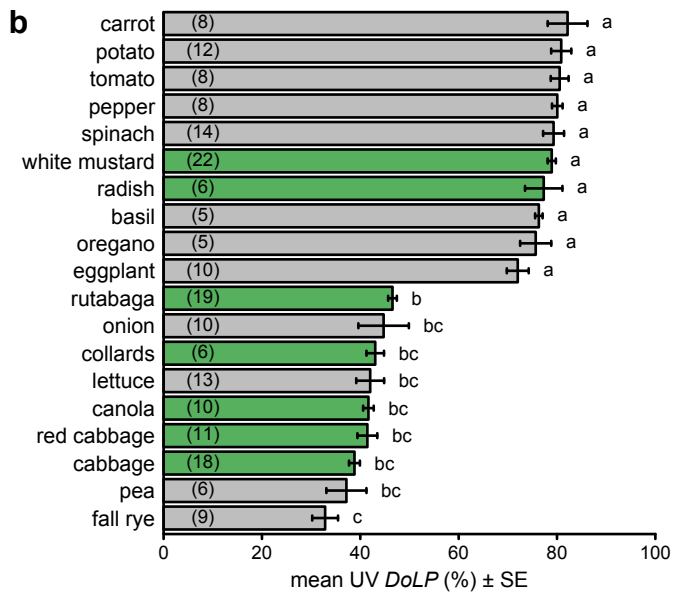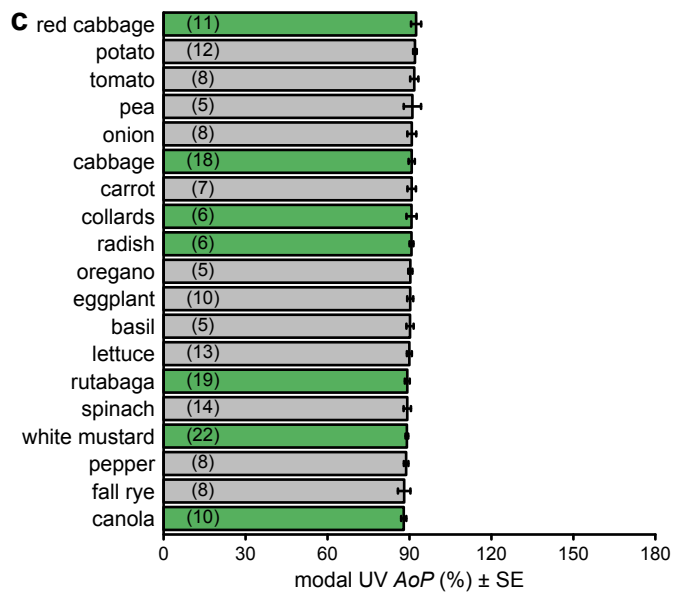

**Figure S5.** Comparison of intensity (a), degree of linear polarization (*DoLP*) (b), and axis of polarization (*AoP*) (c) among host plants (green bars) and non-host plants (grey bars) of *Pieris rapae*. These measurements used the UV color band. Bars show mean or modal values with number of plants measured noted in parentheses in each bar. Bars with different letters differ statistically ( $p < 0.05$ ), as determined by a post-hoc Tukey test.

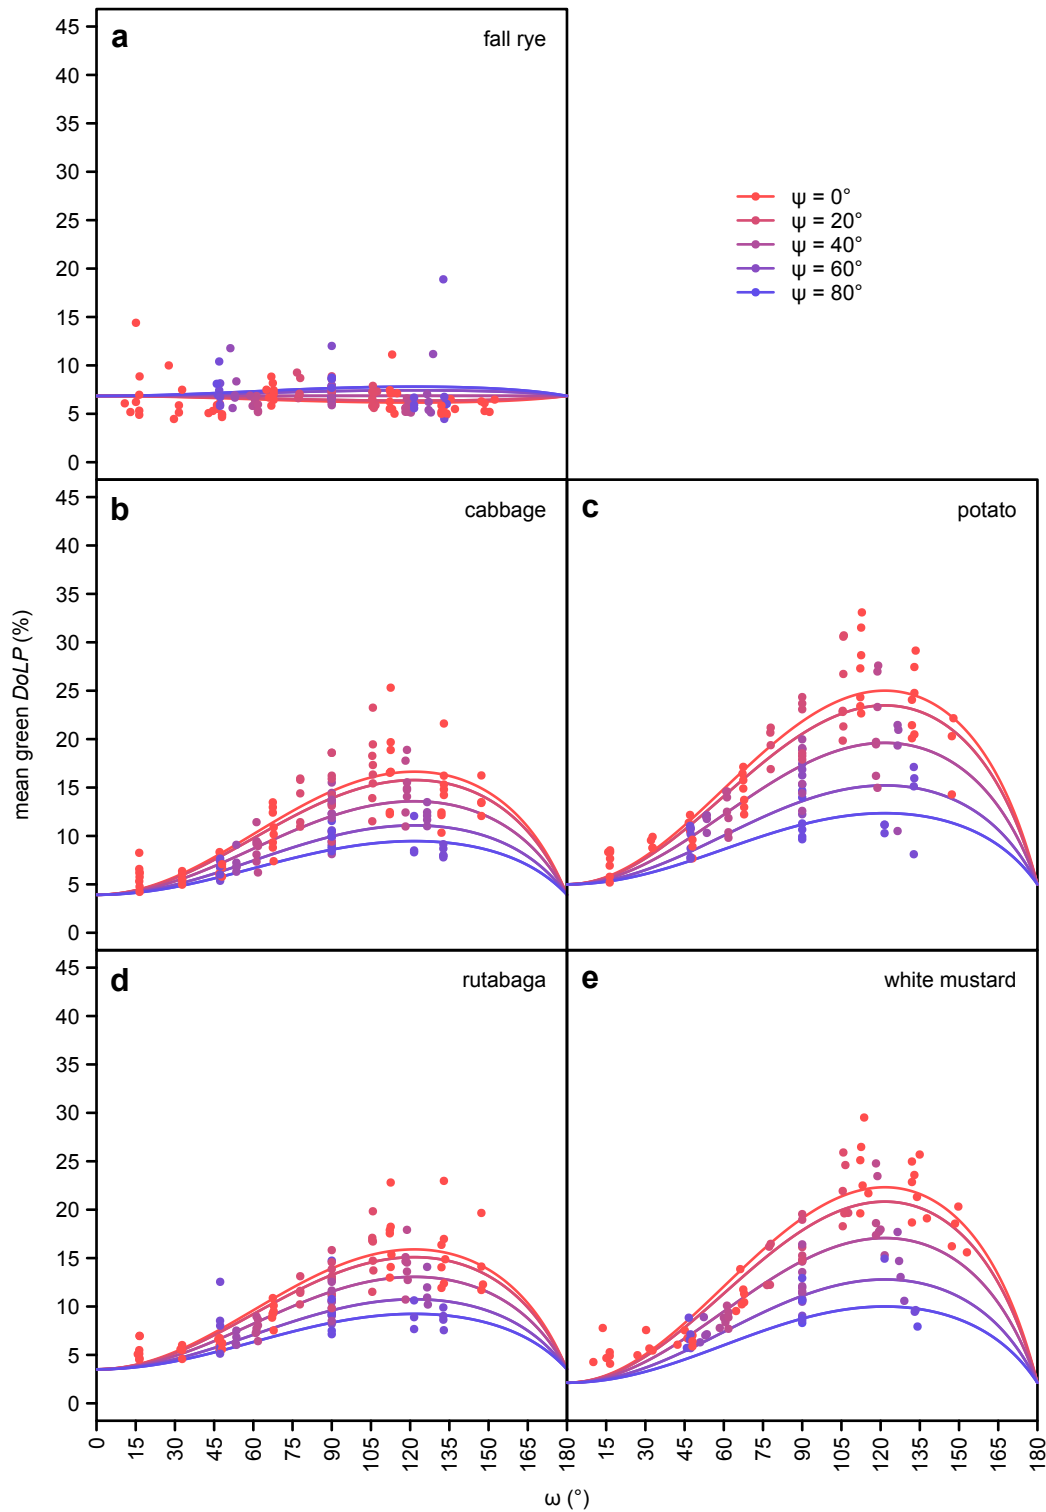

**Figure S6.** The effect of  $\omega$  (angle between observer and light source with the plant at its vertex; see Fig. 1) and  $\psi$  (2-dimensional component of  $\omega$  perpendicular to the plane passing through both the observer and the plant; see Fig. 1) on the mean degree of linear polarization ( $DoLP$ ) of the green color band, as measured in five select plant species using photo polarimetry. Cabbage, rutabaga and white mustard are host plants of *Pieris rapae*.

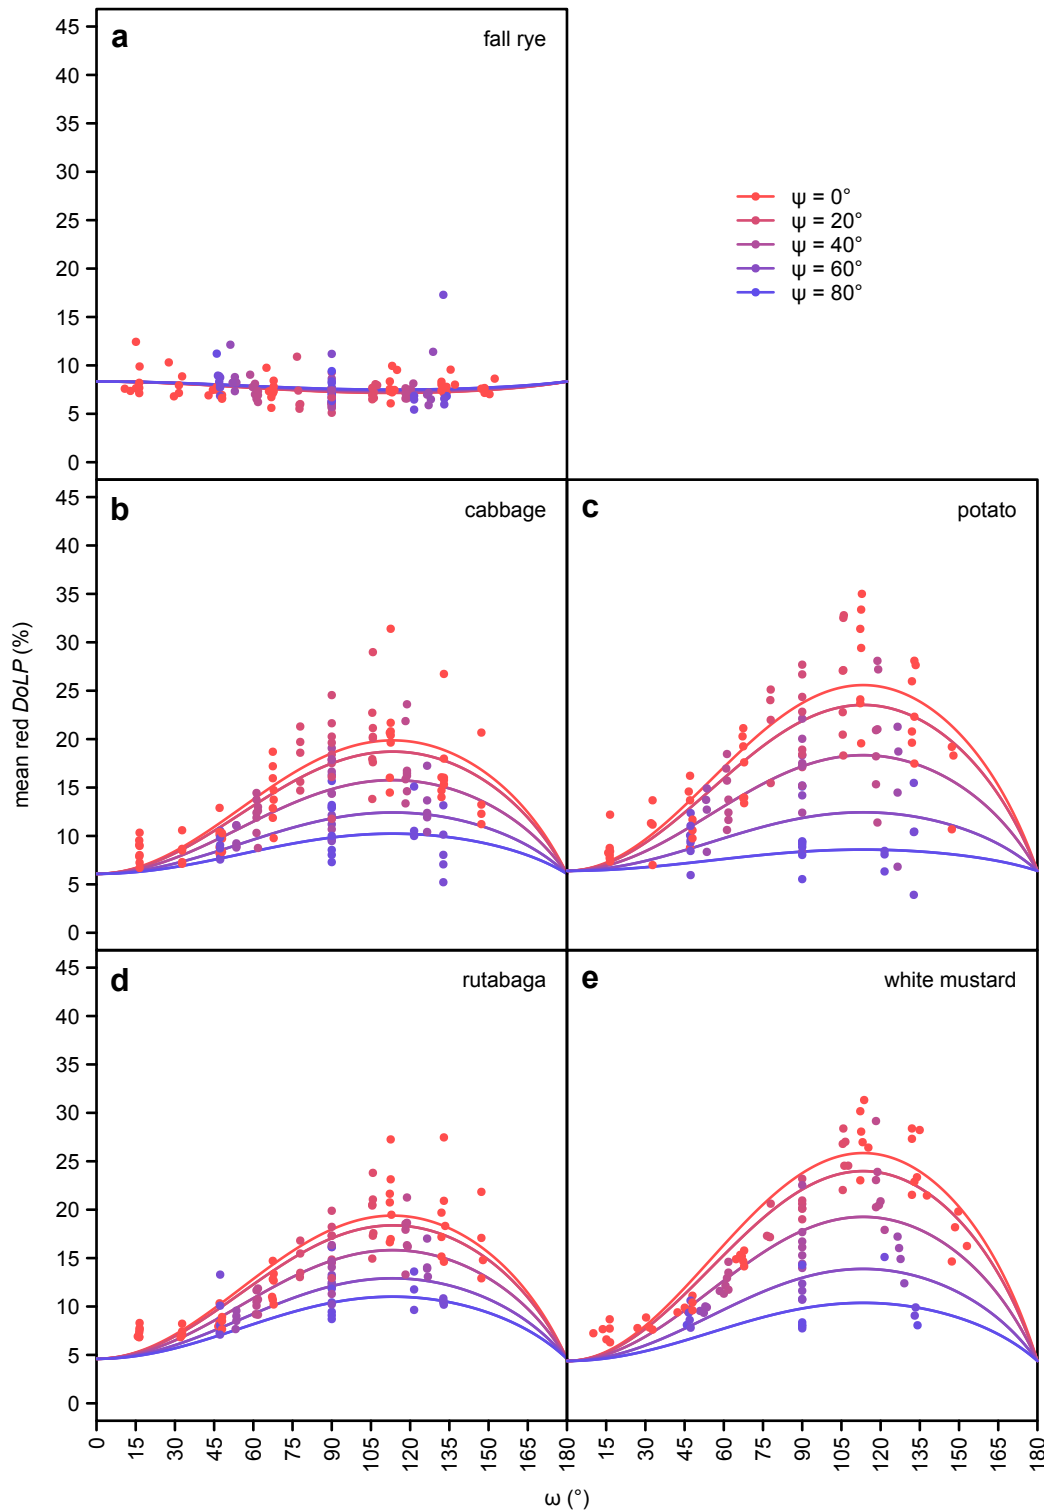

**Figure S7.** The effect of  $\omega$  (angle between observer and light source with the plant at its vertex; see Fig. 1) and  $\psi$  (2-dimensional component of  $\omega$  perpendicular to the plane passing through both the observer and the plant; see Fig. 1) on the mean degree of linear polarization (*DoLP*) of the blue color band, as measured in five select plant species using photo polarimetry. Cabbage, rutabaga and white mustard are host plants of *Pieris rapae*.

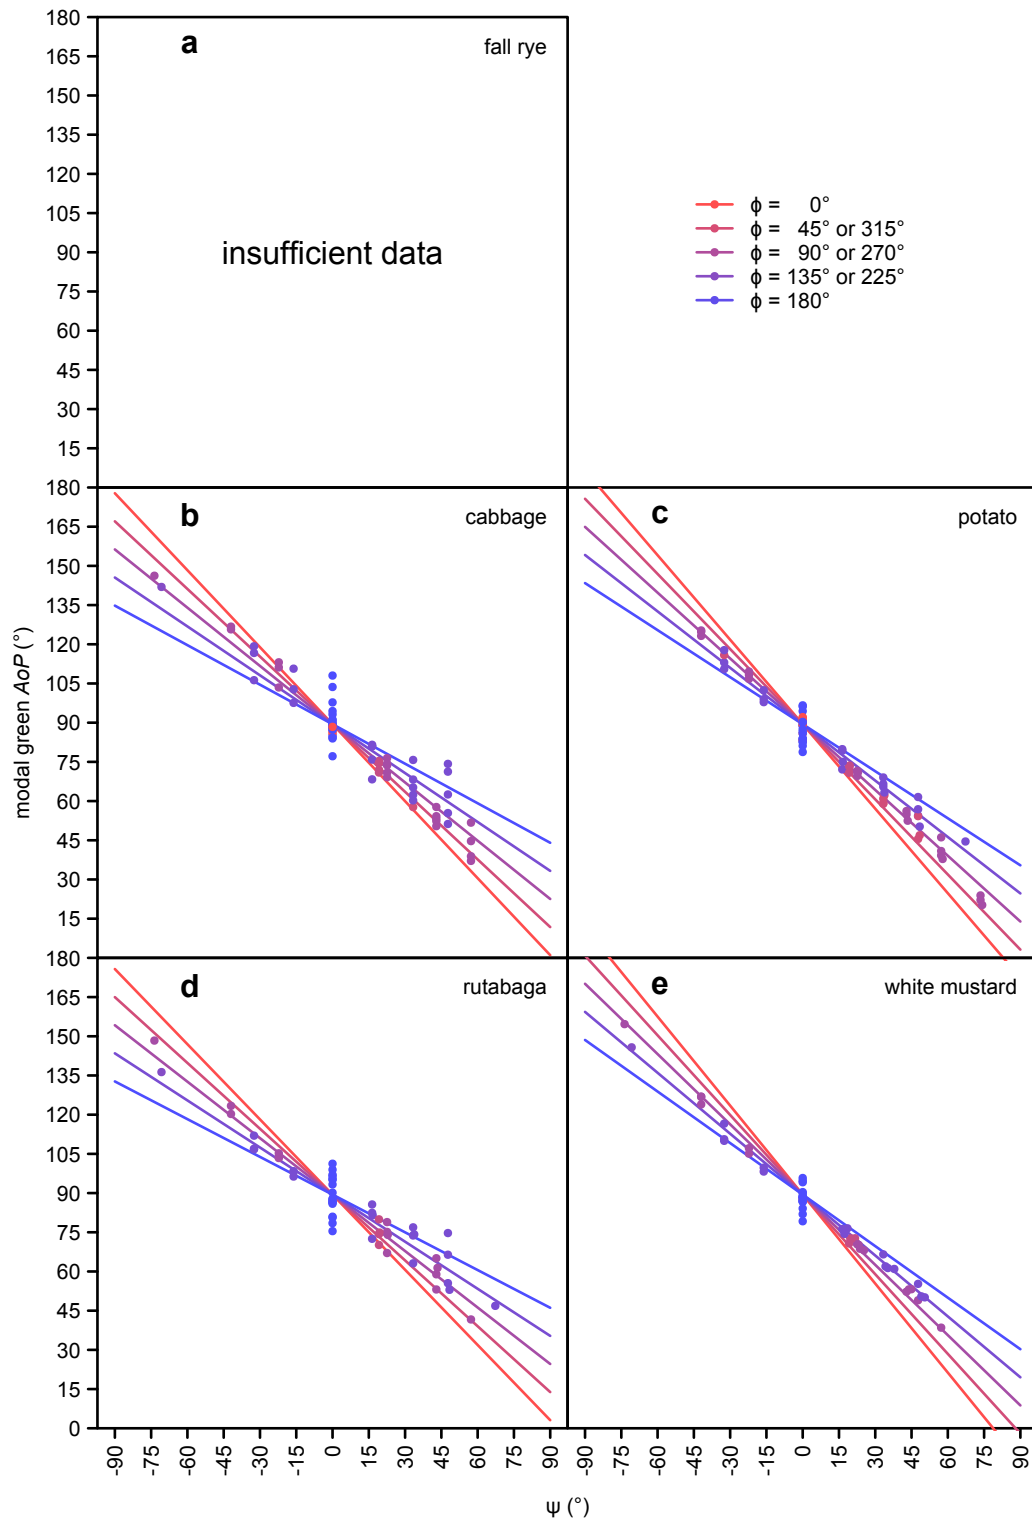

**Figure S8.** The effect of  $\psi$  (2-dimensional component of  $\omega$  perpendicular to the plane passing through both the observer and plant; see Fig. 1) and  $\phi$  (angle between the azimuth of the observer and the light source; see Fig. 1) on the modal axis of polarization ( $AoP$ ) of the green color band, as measured in five select plant species using photo polarimetry. Cabbage, rutabaga and white mustard are host plants of *Pieris rapae*. Fall rye data were excluded from analyses due to an insufficient number of measurements meeting the inclusion criterion ( $>10\%$  of pixels with a degree of linear polarization above 15%).

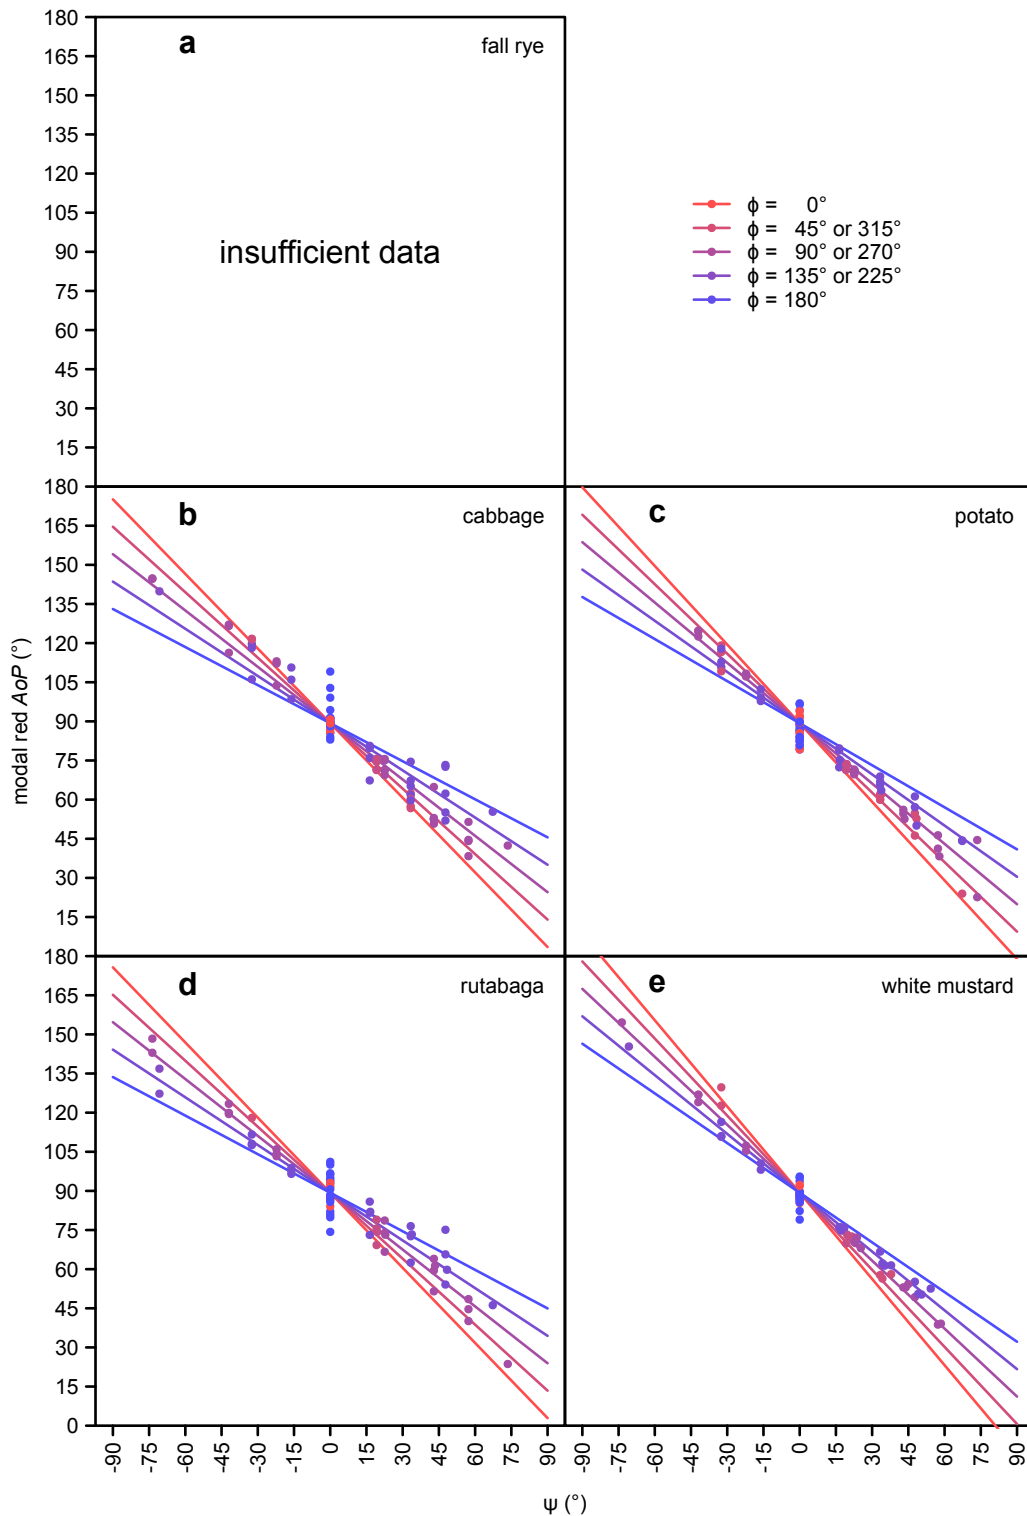

**Figure S9.** The effect of  $\psi$  (2-dimensional component of  $\omega$  perpendicular to the plane passing through both the observer and plant; see Fig. 1) and  $\phi$  (angle between the azimuth of the observer and the light source; see Fig. 1) on the modal axis of polarization (AoP) of the red color band, as measured in four select plant species using photo polarimetry. Cabbage, rutabaga and white mustard are host plants of *Pieris rapae*. Fall rye data were excluded from analyses due to an insufficient number of measurements meeting the inclusion criterion (>10% of pixels with a degree of linear polarization above 15%).

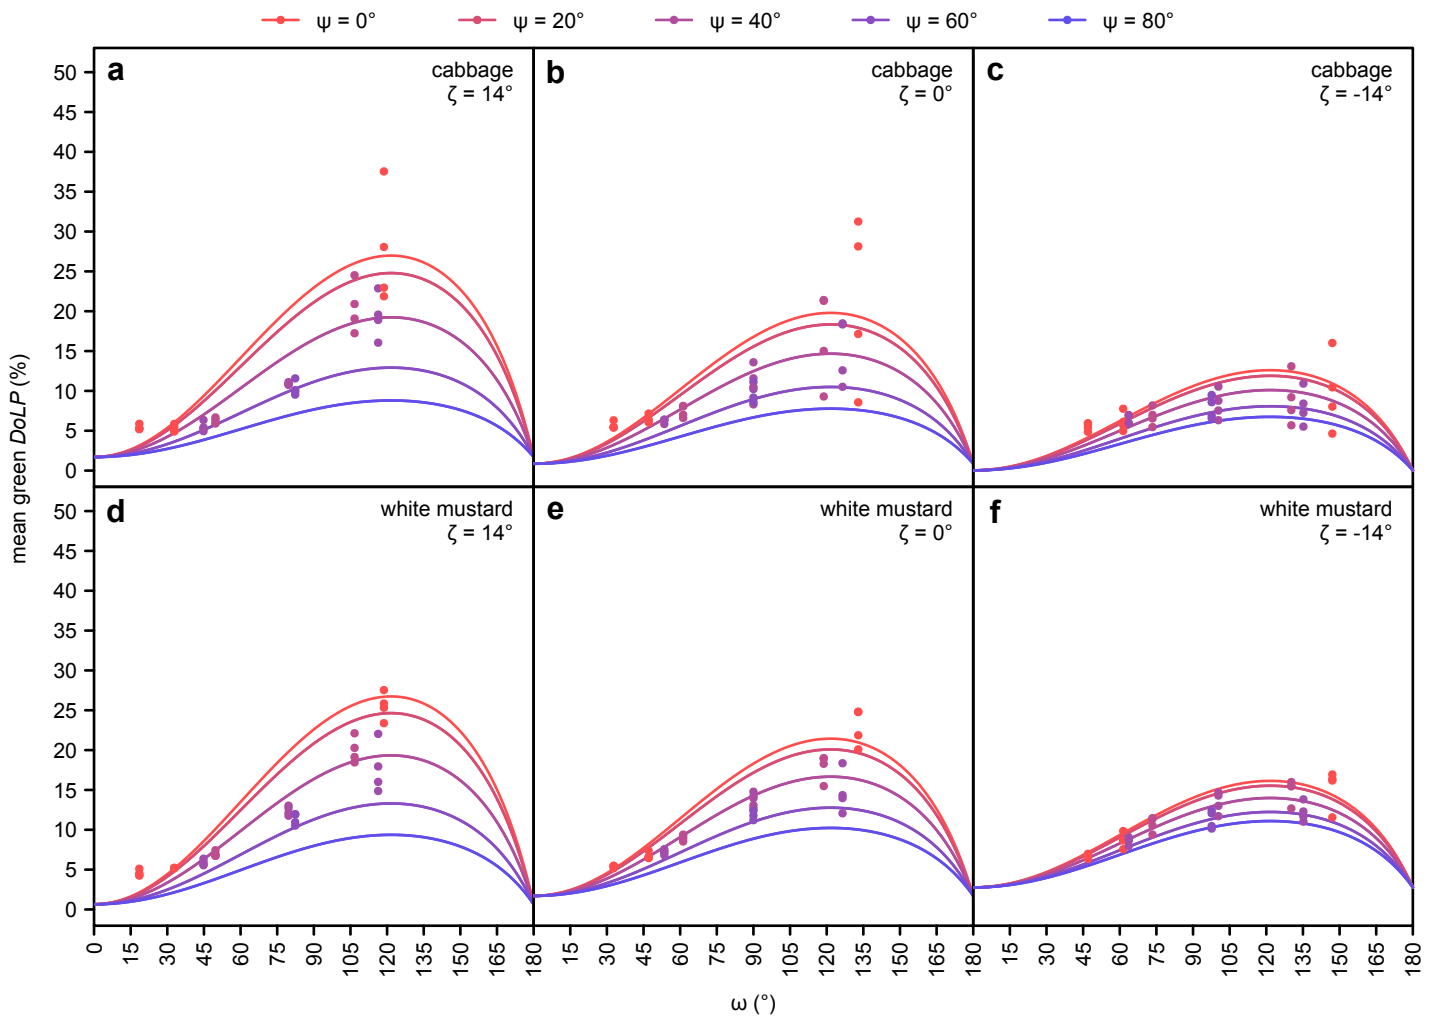

**Figure S10.** Additional effect of  $\zeta$  (elevation of the observer; see Fig. 1) on the mean degree of linear polarization (*DoLP*) of the green color band, as measured in cabbage and white mustard (host plants of *Pieris rapae*) using photo polarimetry.

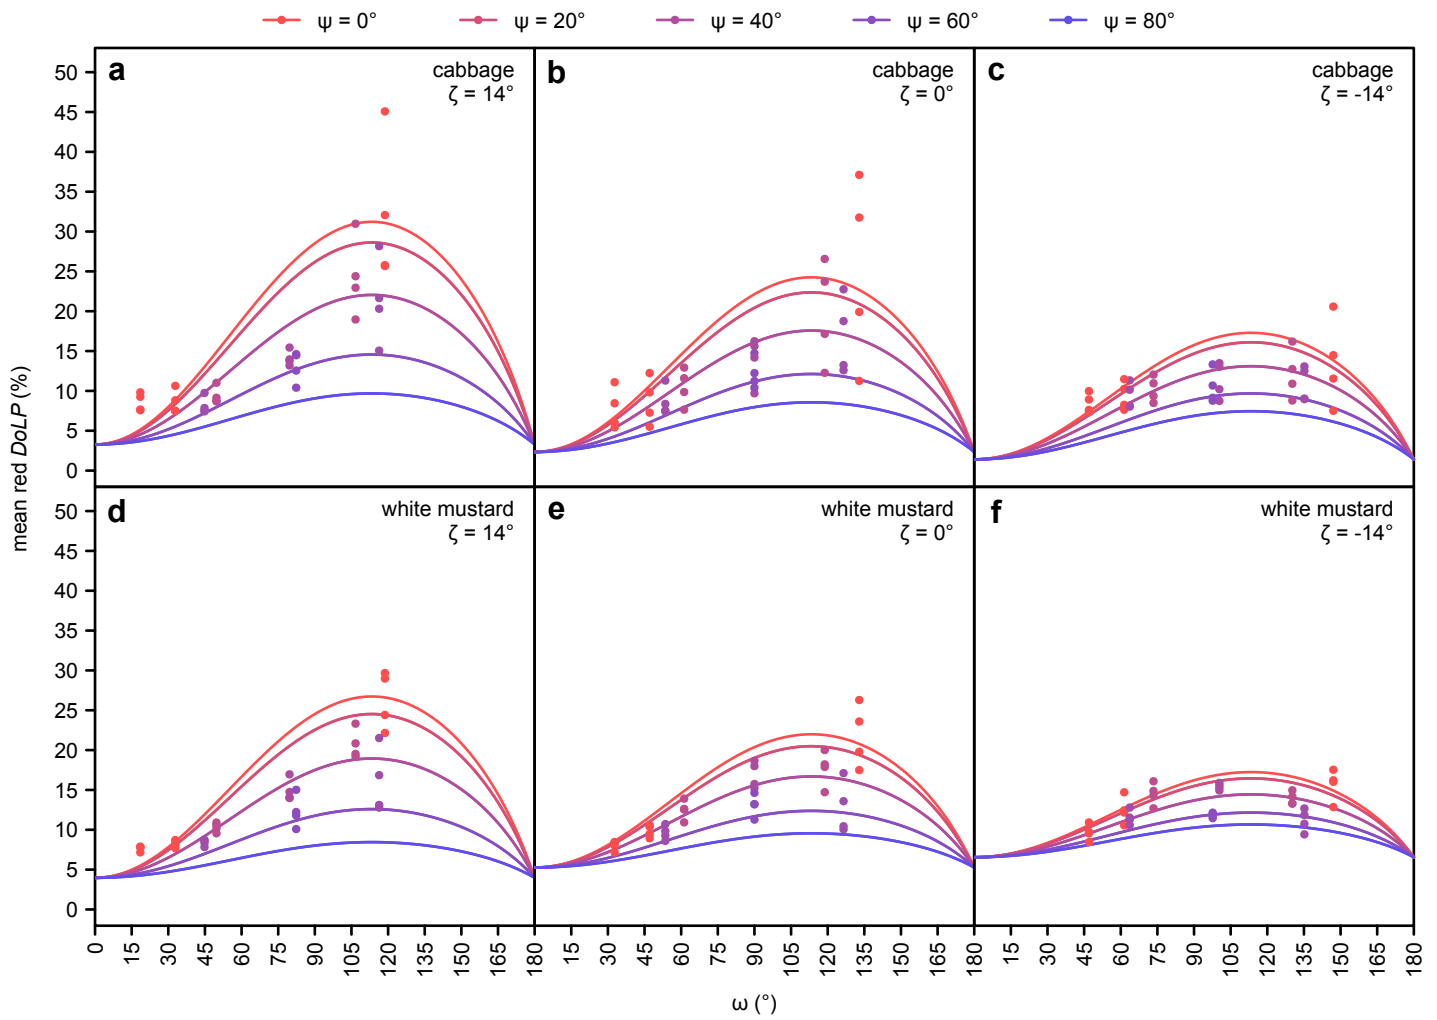

**Figure S11.** Additional effect of  $\zeta$  (elevation of the observer; see Fig. 1) on the mean degree of linear polarization (*DoLP*) of the red color band, as measured in cabbage and white mustard (host plants of *Pieris rapae*) using photo polarimetry.



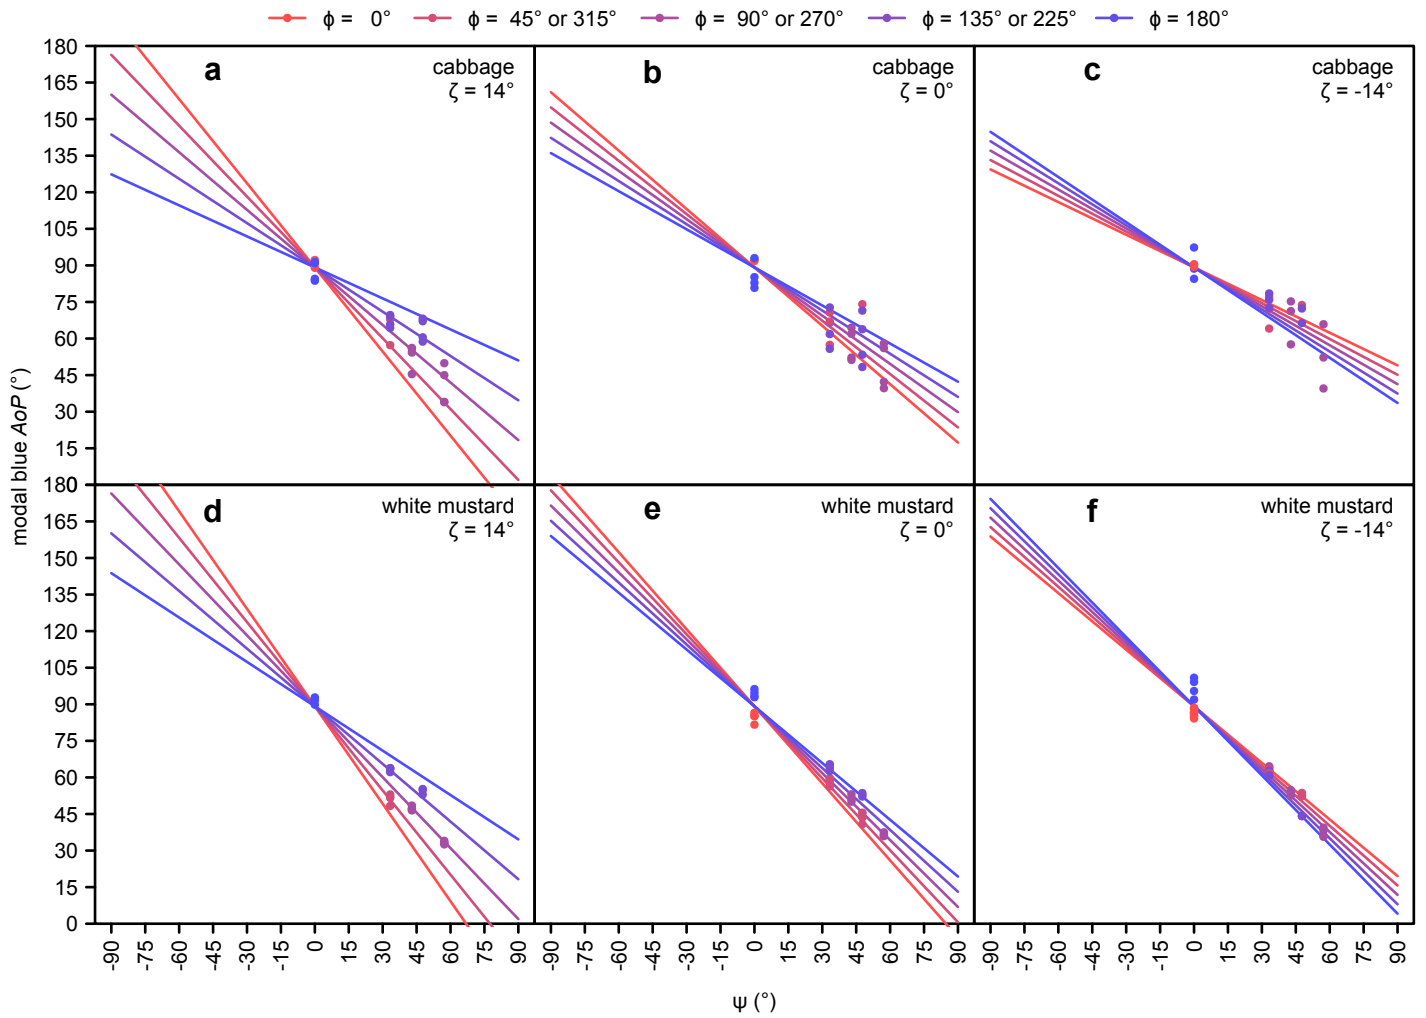

**Figure S12.** Additional effect of  $\zeta$  (elevation of the observer; see Fig. 1) on the modal axis of polarization (*AoP*) of the blue color band, as measured in cabbage and white mustard (hosts of *Pieris rapae*) using photo polarimetry. Red and green color band data were excluded from analyses due to an insufficient number of measurements meeting the inclusion criterion (<10% of pixels with a degree of linear polarization above 15%).

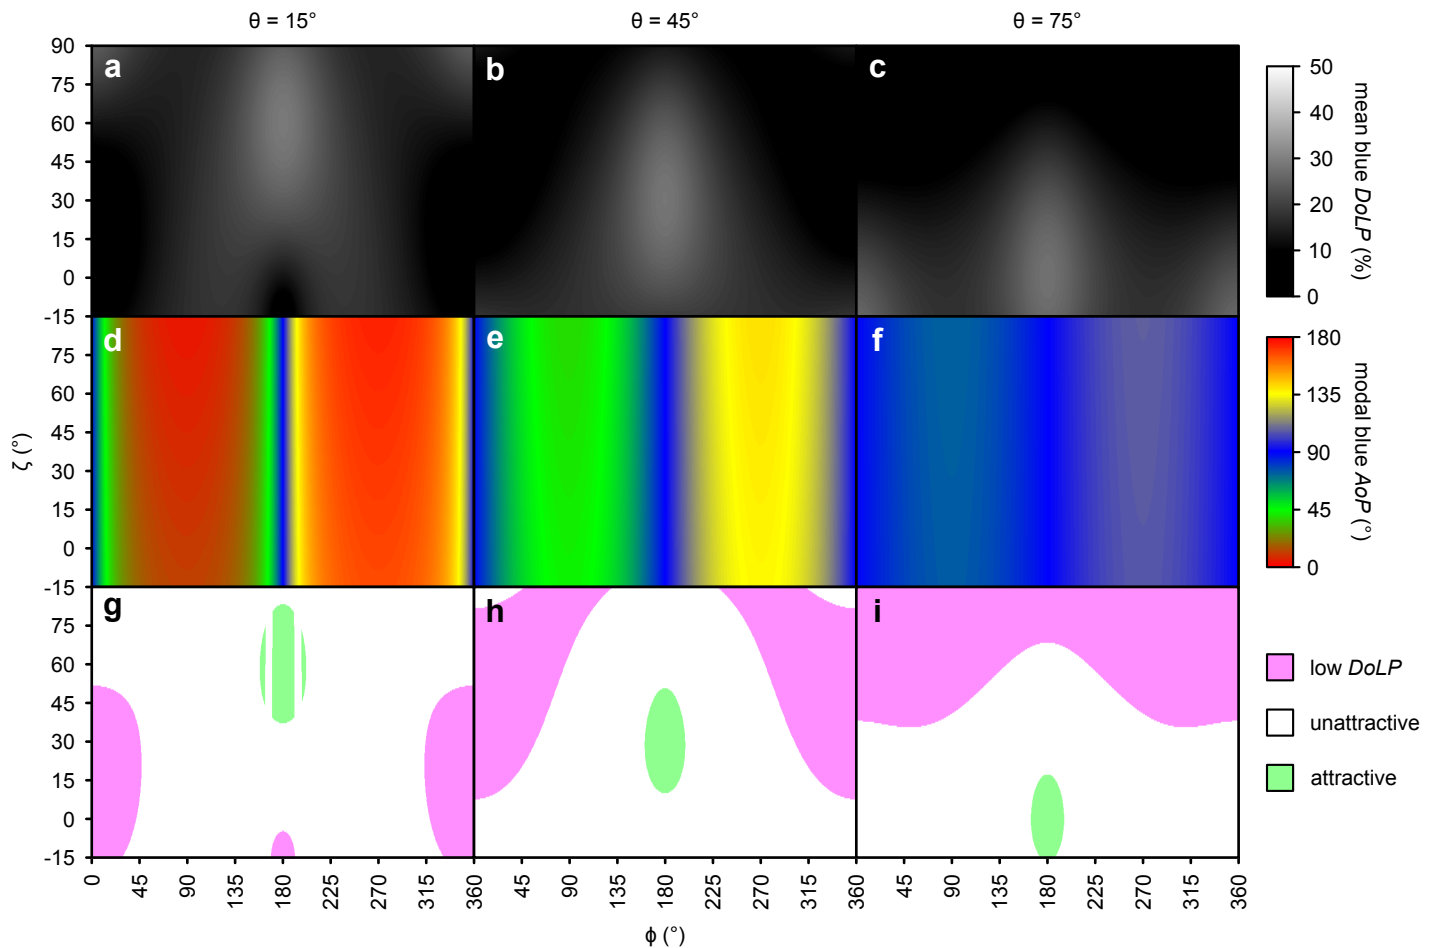

**Figure S13.** Effects of approach direction (angle between the azimuth of the observer and the light source ( $\phi$ , see Fig. 1) and elevation of the observer ( $\zeta$ ; see Fig. 1) on the mean degree of linear polarization (*DoLP*) (**a-c**) and the modal axis of polarization (*AoP*) (**d-f**) of the blue color band of white mustard plants (host of *Pieris rapae*). Attractiveness of resulting polarization characteristics to *Pieris rapae* (**g-i**), based on a previous behavioral study (Blake et al. 2019). Approach trajectories resulting in attractive characteristics (*DoLP* = 26-36% and *AoP* = 0-38, 53-128 or 143-180°) and unattractive characteristics (*DoLP* = 10-26% or *AoP* = 38-53°, 128-143°) are shown in green and white, respectively, with pink indicating trajectories resulting in a moderately-attractive low *DoLP* (<10%). Higher *DoLP* (36-60%) would also be unattractive but were not predicted by these models. These effects changed with light source elevation ( $\theta$ ; see Fig. 1) which is shown at 15° (**a, d, g**), 45° (**b, e, h**) and 75° (**c, f, i**).
